# Supplementary material
Source: publisher figshare collection journal article supplement (https://gsajournals.figshare.com/ndownloader/files/10799204)
Supplement: Supplementary file 1 [file 10799204]

## Sheet: Original
		2017 GWAS p-value				5.55e-82	3.84e-14	2.07e-13	9.18e-09	1.75e-17	1.56e-97	2.76e-87	7.47e-83	1.69e-64	7.25e-74	1.14e-49	5.62e-67	Not Sig.	6.56e-67
		2016 GWAS p-value				1.68e-176	2.08e-18	9.54e-18	2.61e-33	6.61e-31	2.95e-222	9.29e-169	7.46e-168	4.57e-98	2.93e-103	2.83e-82	9.62e-96	9.4e-14	5.29e-107
		F. vesca 4.0 Chromosome Position				93425	226718	239807	382684	424794	636941	768987	806162	2167424	2207152	2308408	2346278	2346653	2387499
		Affymetrix SNP ID				Affx-88820568	Affx-88822824	Affx-88822812	Affx-88822765	Affx-88822745	Affx-88822661	Affx-88822632	Affx-88822620	Affx-88822907	Affx-88822917	Affx-88822533	Affx-88822547	Affx-88822549	Affx-88822569
		Affymetric Probe Set ID				AX-89822405	AX-89823287	AX-89880439	AX-89823267	AX-89783844	AX-89823233	AX-89783809	AX-89783805	AX-89823310	AX-89783905	AX-89783772	AX-89783780	AX-89783781	AX-89823199
		Mapped to 2C (F = Fronteras only)				2C	2C (F)	-	2C (F)	2C	2C	2C	2C	2C	2C	-	2C	-	2C
Accession	Alias	2016 Experiment LSMean (9 Weeks Post-Inoculation)	2016 Experiment Phenotypic Classification	2017 Experiment LSMean (36 Weeks Post-Inocuation)	2017 Experiment Phenotypic Classification	AX-89879574	AX-166521406	AX-166512053	AX-123360644	AX-123357493	AX-166521396	AX-166503947	AX-166503945	AX-166512058	AX-166503965	AX-166503940	AX-166503941	AX-123357488	AX-123360640
00C003P602	00C003P602	1	R	3.19318	S	A/G	T/G	T/C	T/C	A/G	A/G	A/G	A/G	A/A	G/G	A/A	A/A	G/G	A/A
00C018P601	00C018P601	5	S	4.625	S	A/A	T/G	T/C	T/C	NA	G/G	G/G	A/A	A/A	G/G	A/A	A/A	T/G	A/A
00C027P601	00C027P601	5	S	4.25	S	A/A	G/G	C/C	T/T	G/G	G/G	G/G	A/A	A/A	G/G	A/A	A/A	T/T	A/A
00C038P606	00C038P606	1	R	1.02651	R	A/G	G/G	C/C	T/T	G/G	A/G	A/G	A/G	A/C	T/G	A/G	A/G	T/G	A/G
00C046P601	00C046P601	5	S	2.25	R	A/A	T/G	T/C	T/C	NA	G/G	G/G	A/A	A/A	G/G	A/A	A/A	T/G	A/A
00C057P613	00C057P613	1	R	2.375	R	A/G	G/G	C/C	T/T	G/G	NA	A/G	A/G	A/C	T/G	A/G	A/G	T/G	A/G
00C139P003	00C139P003	5	S	4	S	A/A	T/G	T/C	T/C	A/G	G/G	G/G	A/A	A/A	G/G	A/A	A/A	T/G	A/A
00C259P002	Palomar	4.375	S	3	S	A/A	T/G	T/C	C/C	A/A	G/G	G/G	A/A	A/A	G/G	A/A	A/A	T/G	A/A
01C053P602	01C053P602	1.125	R	1.375	R	A/G	T/G	T/C	T/C	A/G	A/G	A/G	A/G	A/C	T/G	A/G	A/G	G/G	A/G
01C057P601	01C057P601	1.75	R	4.02651	S	A/G	T/G	T/C	T/C	A/G	A/G	A/G	A/G	A/C	T/G	A/G	A/G	G/G	A/G
01C080P602	01C080P602	1	R	1.25	R	A/G	T/G	T/C	T/C	A/G	A/G	A/G	A/G	A/C	T/G	A/G	A/G	G/G	A/G
01C111P004	01C111P004	1.125	R	2.125	R	A/G	T/G	T/C	T/C	A/G	A/G	A/G	A/G	A/C	T/G	A/G	A/G	G/G	A/G
01C132P003	Monterey	5	S	4	S	A/A	T/T	T/T	C/C	A/A	G/G	G/G	A/A	A/A	G/G	A/A	A/A	G/G	A/A
01C134P001	01C134P001	5	S	5	S	A/A	T/G	T/C	C/C	A/A	G/G	G/G	A/A	A/A	G/G	A/A	A/A	T/G	A/A
01C134P003	01C134P003	5	S	5	S	A/A	T/G	T/C	T/C	A/G	G/G	G/G	A/A	A/A	G/G	A/A	A/A	T/G	A/A
01C136P001	01C136P001	1	R	1.125	R	G/G	G/G	C/C	T/T	G/G	A/A	A/A	G/G	C/C	T/T	G/G	A/G	G/G	A/G
01C138P001	01C138P001	5	S	3.625	S	A/A	T/G	T/C	C/C	A/A	G/G	G/G	A/A	A/A	G/G	A/A	A/A	T/G	A/A
01C139P002	San_Andreas	1.125	R	NA	NA	A/G	T/G	T/C	T/C	NA	A/G	A/G	NA	A/C	T/G	A/G	A/G	G/G	A/G
01C141P002	01C141P002	1	R	1.25	R	A/G	G/G	C/C	T/C	A/G	A/G	A/G	A/G	A/C	T/G	A/G	A/G	T/G	A/G
01C158P001	01C158P001	1.625	R	3.25	S	A/G	G/G	C/C	T/T	G/G	A/G	A/G	A/G	A/C	T/G	A/G	A/G	T/G	A/G
01C203P006	01C203P006	2	R	1.25	R	G/G	G/G	C/C	T/T	G/G	A/G	A/A	G/G	C/C	T/T	NA	A/G	G/G	A/G
01C206P005	Portola	1.25	R	2.125	R	A/G	G/G	C/C	T/C	G/G	A/G	A/G	A/G	A/C	T/G	A/G	A/G	G/G	A/G
02C068P608	02C068P608	5	S	3.25	S	A/A	G/G	C/C	T/T	G/G	G/G	G/G	A/A	A/A	G/G	A/A	A/A	T/T	A/A
02C093P006	02C093P006	5	S	3.625	S	A/A	T/T	T/T	C/C	A/A	G/G	G/G	A/A	A/A	G/G	A/A	A/A	G/G	A/A
02C095P004	02C095P004	5	S	3.625	S	A/A	T/G	T/C	T/C	A/G	G/G	G/G	A/A	A/A	G/G	A/A	A/A	T/G	A/A
02C103P002	02C103P002	1	R	1	R	A/G	G/G	C/C	T/T	G/G	A/G	A/G	A/G	A/C	T/G	A/G	A/G	T/G	A/G
02C132P006	02C132P006	5	S	3.25	S	A/A	G/G	C/C	C/C	A/G	G/G	G/G	A/A	A/A	G/G	A/A	A/A	T/G	A/A
02C134P003	02C134P003	5	S	4.5	S	A/A	T/G	T/C	C/C	A/G	G/G	G/G	A/A	A/A	G/G	A/A	A/A	G/G	A/A
02C143P003	02C143P003	4.5	S	3.5	S	A/A	G/G	C/C	T/T	G/G	G/G	G/G	A/A	A/A	G/G	A/A	A/A	T/T	A/A
02C144P003	02C144P003	3.125	S	2	R	A/A	T/G	T/C	T/C	A/G	G/G	G/G	A/A	A/A	G/G	A/A	A/A	T/G	A/A
02C156P003	02C156P003	4	S	3.25	S	A/A	T/G	T/C	T/C	A/G	G/G	G/G	A/A	A/A	G/G	A/A	A/A	NA	A/A
02C229P001	02C229P001	5	S	3.125	S	A/A	T/G	T/C	C/C	NA	G/G	G/G	A/A	A/A	G/G	A/A	A/A	T/G	A/A
02C230P001	02C230P001	1.25	R	1.75	R	A/G	G/G	C/C	T/T	G/G	A/G	A/G	A/G	A/C	T/G	A/G	A/A	T/G	A/A
03C001P606	03C001P606	1	R	3.56721	S	A/G	T/G	T/C	T/C	A/G	A/G	A/G	A/G	A/A	G/G	A/A	A/A	G/G	A/A
03C065P601	03C065P601	1	R	1.25	R	A/G	G/G	C/C	T/C	A/G	A/G	A/G	A/G	A/A	G/G	A/A	A/A	T/G	A/A
03C075P601	03C075P601	4.375	S	2.25	R	A/A	T/G	T/C	T/C	A/G	G/G	G/G	A/A	A/A	G/G	A/A	A/A	T/G	A/A
03C092P008	03C092P008	1	R	1.125	R	A/G	T/G	T/C	T/C	A/G	A/G	A/G	A/G	A/A	G/G	A/A	A/A	T/G	A/A
03C102P002	03C102P002	1	R	1	R	A/G	T/G	T/C	T/C	A/G	A/G	A/G	A/G	A/C	T/G	A/G	A/G	G/G	A/G
03C111P005	03C111P005	5	S	4.375	S	A/A	T/T	T/T	C/C	A/A	G/G	G/G	A/A	A/A	G/G	A/A	A/A	G/G	A/A
03C114P003	03C114P003	5	S	3.875	S	A/A	T/G	T/C	C/C	A/A	G/G	G/G	A/A	A/A	G/G	A/A	A/A	T/G	A/A
03C132P003	03C132P003	5	S	2.875	S	A/A	G/G	C/C	T/T	G/G	G/G	G/G	A/A	A/A	G/G	A/A	A/A	T/T	A/A
03C149P008	03C149P008	5	S	2.25	R	A/A	T/G	T/C	C/C	A/A	G/G	G/G	A/A	A/A	G/G	A/A	A/A	T/G	A/A
04C001P601	04C001P601	5	S	3.375	S	A/A	T/G	T/C	T/C	A/G	G/G	G/G	A/A	A/A	G/G	A/A	A/A	T/G	A/A
04C009P005	04C009P005	4.75	S	3.375	S	A/A	T/G	T/C	C/C	A/A	G/G	G/G	A/A	A/A	G/G	A/A	A/A	T/T	A/A
04C013P604	04C013P604	4.375	S	2.875	S	A/A	T/G	T/C	T/C	A/G	G/G	G/G	A/A	A/A	G/G	A/A	A/A	T/G	A/A
04C018P004	04C018P004	1	R	1.75	R	A/G	G/G	C/C	T/C	A/G	A/G	A/G	A/G	A/C	T/G	NA	A/G	T/G	A/G
04C020P604	04C020P604	5	S	4.625	S	A/A	T/G	T/C	C/C	A/A	G/G	G/G	A/A	A/A	G/G	A/A	A/A	T/G	A/A
04C038P603	04C038P603	1	R	2.85985	S	A/G	T/G	T/C	T/C	A/G	A/G	A/G	A/G	A/A	G/G	A/A	A/A	T/G	A/A
04C039P001	Benicia	5	S	3.5	S	A/A	T/G	T/C	T/C	A/G	G/G	G/G	A/A	A/A	G/G	A/A	A/A	T/G	A/A
04C041P006	04C041P006	1	R	1.35985	R	A/G	G/G	C/C	T/C	A/G	A/G	A/G	A/G	A/C	T/G	A/G	A/G	T/G	A/G
04C041P007	04C041P007	1	R	1.375	R	A/G	G/G	C/C	T/C	A/G	A/G	A/G	A/G	A/C	T/G	A/G	A/G	T/G	A/G
04C044P603	Mojave	5	S	2.5	R	A/A	T/G	T/C	C/C	A/A	G/G	G/G	A/A	A/A	G/G	A/A	A/A	T/G	A/A
04C045P605	04C045P605	5	S	2.75	S	A/A	T/T	T/T	C/C	A/A	G/G	G/G	A/A	A/A	G/G	A/A	A/A	G/G	A/A
04C053P001	04C053P001	4.375	S	3.5	S	A/A	T/G	T/C	T/C	A/G	G/G	G/G	A/A	A/A	G/G	A/A	A/A	T/G	A/A
04C056P608	04C056P608	5	S	4.625	S	A/A	G/G	C/C	T/C	A/G	G/G	G/G	A/A	A/A	G/G	A/A	A/A	T/T	A/A
04C073P002	04C073P002	5	S	4.375	S	A/A	T/T	T/T	C/C	A/A	G/G	G/G	A/A	A/A	G/G	A/A	A/A	G/G	A/A
04C076P004	04C076P004	1	R	1.125	R	A/G	T/G	T/C	T/C	A/G	A/G	A/G	A/G	A/C	T/G	A/G	A/G	G/G	A/G
04C077P002	04C077P002	1.125	R	2.85163	S	A/G	T/G	T/C	T/C	A/G	A/G	A/G	A/G	A/C	T/G	A/G	A/G	G/G	A/G
04C085P601	04C085P601	2.375	(S)	3.75	S	G/G	G/G	C/C	T/T	G/G	A/A	A/A	G/G	C/C	T/T	G/G	G/G	G/G	G/G
05C027P605	05C027P605	5	S	4.875	S	A/A	G/G	C/C	T/C	A/G	G/G	G/G	A/A	A/A	G/G	A/A	A/A	T/T	A/A
05C054P611	05C054P611	4.875	S	3.125	S	A/A	T/G	T/C	T/C	A/G	G/G	G/G	A/A	A/A	G/G	A/A	A/A	T/G	A/A
05C065P608	05C065P608	1	R	2	R	A/G	T/G	T/C	T/C	A/G	A/G	A/G	A/G	A/C	T/G	A/G	A/G	G/G	A/G
05C092P011	05C092P011	5	S	2.875	S	A/A	T/T	T/T	C/C	A/A	G/G	G/G	A/A	A/A	G/G	A/A	A/A	G/G	A/A
05C095P004	05C095P004	5	S	4.375	S	A/A	T/T	T/T	C/C	A/A	G/G	G/G	A/A	A/A	G/G	A/A	A/A	G/G	A/A
05C097P007	05C097P007	5	S	2.25	R	A/A	T/G	T/C	C/C	A/A	G/G	G/G	A/A	A/A	G/G	A/A	A/A	T/G	A/A
05C099P006	05C099P006	5	S	4.625	S	A/A	T/G	T/C	C/C	A/A	G/G	G/G	A/A	A/A	G/G	A/A	A/A	T/G	A/A
05C106P002	05C106P002	5	S	4	S	A/A	G/G	C/C	T/C	A/G	G/G	G/G	A/A	A/A	G/G	A/A	A/A	T/T	A/A
05C107P002	05C107P002	5	S	3.75	S	A/A	T/G	T/C	T/C	NA	G/G	G/G	A/A	A/A	G/G	A/A	A/A	T/G	A/A
05C108P007	05C108P007	5	S	3	S	A/A	T/G	T/C	T/C	A/G	G/G	G/G	A/A	A/A	G/G	A/A	A/A	T/G	A/A
05C109P002	05C109P002	5	S	2.125	R	A/A	T/G	T/C	T/C	A/G	G/G	G/G	A/A	A/A	G/G	A/A	A/A	T/G	A/A
05C115P005	05C115P005	1	R	1.125	R	A/G	G/G	C/C	T/T	G/G	A/G	A/G	A/G	A/C	T/G	A/G	A/G	T/G	A/G
05C117P005	05C117P005	1	R	2.85163	S	A/G	T/G	T/C	T/C	A/G	A/G	A/G	A/G	A/C	T/G	A/G	A/G	G/G	A/G
05C120P009	05C120P009	4.125	S	2.75	S	A/A	T/G	T/C	T/C	A/G	G/G	G/G	A/A	A/A	G/G	A/A	A/A	T/G	A/A
05C132P001	05C132P001	5	S	4.47136	S	A/A	T/G	T/C	C/C	A/A	G/G	G/G	A/A	A/A	G/G	A/A	A/A	T/G	A/A
05C144P003	05C144P003	1	R	1.625	R	A/G	G/G	C/C	T/C	A/G	A/G	A/G	A/G	A/C	T/G	A/G	A/G	T/G	A/G
05C148P002	05C148P002	1	R	1.5	R	A/G	G/G	C/C	T/C	A/G	A/G	A/G	A/G	A/C	T/G	A/G	A/G	T/G	A/G
05C154P002	05C154P002	2	R	1.51829	R	A/G	T/G	T/C	T/C	NA	A/G	A/G	A/G	A/C	T/G	A/G	A/G	G/G	A/G
05C165P001	05C165P001	5	S	3.875	S	A/A	T/G	T/C	T/C	A/G	G/G	G/G	A/A	A/A	G/G	A/A	A/A	T/G	A/A
05C172P002	05C172P002	4.25	S	4.125	S	A/A	T/G	T/C	T/C	A/G	G/G	G/G	A/A	A/A	G/G	A/A	A/A	T/G	A/A
05C194P001	05C194P001	5	S	4.125	S	A/A	T/G	T/C	T/C	A/G	G/G	G/G	A/A	A/A	G/G	A/A	A/A	T/G	A/A
05C197P002	05C197P002	1	R	1	R	A/G	T/G	T/C	T/C	A/G	A/G	A/G	A/G	A/C	T/G	A/G	A/G	T/G	A/G
05C199P010	05C199P010	5	S	3.75	S	A/A	T/G	T/C	T/C	A/G	G/G	G/G	A/A	A/A	G/G	A/A	A/A	T/G	A/A
05C205P002	05C205P002	4.625	S	2.625	S	A/A	T/G	T/C	C/C	A/A	G/G	G/G	A/A	A/A	G/G	A/A	A/A	T/G	A/A
05C206P005	05C206P005	5	S	4.25	S	A/A	G/G	C/C	T/C	A/G	G/G	G/G	A/A	A/A	G/G	A/A	A/A	T/T	A/A
06C016P602	06C016P602	4.375	S	2.375	R	A/A	T/G	T/C	T/C	A/G	G/G	G/G	A/A	A/A	G/G	A/A	A/A	T/G	A/A
06C020P605	06C020P605	1	R	1.35985	R	A/G	G/G	C/C	T/T	G/G	A/G	A/G	A/G	A/A	G/G	A/A	A/A	T/G	A/A
06C043P603	06C043P603	5	S	3.875	S	A/A	T/G	T/C	T/C	A/G	G/G	G/G	A/A	A/A	G/G	A/A	A/A	T/G	A/A
06C050P611	06C050P611	5	S	3.5	S	A/A	G/G	C/C	T/C	A/G	G/G	G/G	A/A	A/A	G/G	A/A	A/A	T/T	A/A
06C051P609	06C051P609	5	S	2.5	R	A/A	G/G	C/C	T/T	G/G	G/G	G/G	A/A	A/A	G/G	A/A	A/A	T/T	A/A
06C066P603	06C066P603	5	S	3.75	S	A/A	G/G	C/C	C/C	A/A	G/G	G/G	A/A	A/A	G/G	A/A	A/A	T/T	A/A
06C090P605	06C090P605	5	S	3.875	S	A/A	G/G	C/C	T/T	G/G	G/G	G/G	A/A	A/A	G/G	A/A	A/A	T/T	A/A
06C102P002	06C102P002	5	S	3.875	S	A/A	T/G	T/C	T/C	A/G	G/G	G/G	A/A	A/A	G/G	A/A	A/A	T/G	A/A
06C106P002	06C106P002	5	S	5	S	A/A	T/G	T/C	T/C	A/G	G/G	G/G	A/A	A/A	G/G	A/A	A/A	T/G	A/A
06C109P003	06C109P003	5	S	3.625	S	A/A	T/G	T/C	T/C	A/G	G/G	G/G	A/A	A/A	G/G	A/A	A/A	T/G	A/A
06C110P004	06C110P004	1	R	1.25	R	A/G	G/G	C/C	T/T	NA	A/G	A/G	A/G	A/C	T/G	A/G	A/G	T/G	A/G
06C111P001	06C111P001	5	S	2.625	S	A/A	G/G	C/C	T/T	G/G	G/G	G/G	A/A	A/A	G/G	A/A	A/A	T/T	A/A
06C132P001	06C132P001	5	S	5.01829	S	A/A	T/T	T/T	C/C	A/A	G/G	G/G	A/A	A/A	G/G	A/A	A/A	G/G	A/A
06C132P002	06C132P002	1.25	R	1.5	R	A/G	T/G	T/C	T/C	A/G	A/G	A/G	A/G	A/C	T/G	A/G	A/G	G/G	A/G
06C137P002	06C137P002	5	S	3.875	S	A/A	G/G	C/C	T/C	A/G	G/G	G/G	A/A	A/A	G/G	A/A	A/A	T/T	A/A
06C202P001	06C202P001	5	S	5	S	A/A	T/G	T/C	C/C	A/G	G/G	G/G	A/A	A/A	G/G	A/A	A/A	G/G	A/A
06C204P001	06C204P001	1	R	2.125	R	A/G	G/G	C/C	T/T	G/G	A/G	A/G	A/G	A/C	T/G	A/G	A/G	T/G	A/G
07C001P608	07C001P608	1	R	2.52651	S	A/G	T/G	T/C	T/C	A/A	A/G	A/G	A/G	A/A	G/G	A/A	A/A	G/G	A/A
07C009P601	07C009P601	5	S	3.125	S	A/A	T/T	T/T	C/C	A/A	G/G	G/G	A/A	A/A	G/G	A/A	A/A	T/G	A/A
07C043P001	07C043P001	3.25	S	4.25	S	A/A	G/G	C/C	T/C	A/G	G/G	G/G	A/A	A/A	G/G	A/A	A/A	T/T	A/A
07C049P003	07C049P003	1	R	1	R	A/G	T/G	T/C	T/C	A/G	A/G	A/G	A/G	A/C	T/G	A/G	A/G	G/G	A/G
07C050P601	07C050P601	1	R	3.125	S	A/G	G/G	C/C	T/T	G/G	A/G	A/G	A/G	A/C	T/G	A/G	A/G	T/G	A/G
07C064P002	07C064P002	5	S	3.5	S	A/A	T/T	T/T	C/C	A/A	G/G	G/G	A/A	A/A	G/G	A/A	A/A	G/G	A/A
07C064P003	07C064P003	1	R	1.375	R	A/G	T/G	T/C	T/C	A/G	A/G	A/G	A/G	A/C	T/G	A/G	A/G	G/G	A/G
07C064P005	07C064P005	5	S	3.875	S	A/A	T/T	T/T	C/C	A/A	G/G	G/G	A/A	A/A	G/G	A/A	A/A	G/G	A/A
07C067P608	07C067P608	5	S	3.375	S	A/A	T/G	T/C	T/C	NA	G/G	G/G	A/A	A/A	G/G	A/A	A/A	T/G	A/A
07C090P606	07C090P606	5	S	4.5	S	A/A	G/G	C/C	T/C	A/G	G/G	G/G	A/A	A/A	G/G	A/A	A/A	NA	A/A
07C092P003	07C092P003	1	R	1.125	R	A/G	T/G	T/C	T/C	A/G	A/G	A/G	A/G	A/C	T/G	NA	A/G	G/G	A/G
07C119P001	07C119P001	1	R	1.1505	R	A/G	G/G	C/C	T/C	A/G	A/G	NA	A/G	A/C	T/G	A/G	A/A	T/G	A/A
07C120P003	07C120P003	1	R	1.25	R	A/G	T/G	T/C	T/C	A/G	A/G	A/G	A/G	A/A	G/G	A/A	A/A	T/G	A/A
07C132P003	Merced	5	S	4	S	A/A	T/T	T/T	C/C	A/A	G/G	G/G	A/A	A/A	G/G	A/A	A/A	G/G	A/A
07C134P001	07C134P001	1	R	1	R	A/G	G/G	C/C	T/T	G/G	A/G	A/G	A/G	A/C	T/G	A/G	A/G	T/G	A/G
07C141P001	07C141P001	5	S	3.625	S	A/A	T/G	T/C	C/C	A/A	G/G	G/G	A/A	A/A	G/G	A/A	A/A	T/G	A/A
07C148P001	07C148P001	2	R	1.35985	R	A/G	G/G	C/C	T/T	G/G	A/G	A/G	A/G	A/C	T/G	A/G	A/G	T/G	A/G
07C148P003	07C148P003	1.375	R	1.75	R	A/G	G/G	C/C	T/T	G/G	A/G	A/G	A/G	A/C	T/G	A/G	A/G	T/G	A/G
07C203P001	07C203P001	4.5	S	3.625	S	A/A	T/T	T/T	C/C	A/A	G/G	G/G	A/A	A/A	G/G	A/A	A/A	G/G	A/A
07C216P001	07C216P001	1	R	1.25	R	A/G	G/G	C/C	T/T	G/G	A/G	A/G	A/G	A/C	T/G	A/G	A/G	T/G	A/G
08C005P601	08C005P601	5	S	2.75	S	A/A	T/T	T/T	C/C	A/A	G/G	G/G	A/A	A/A	G/G	A/A	A/A	G/G	A/A
08C013P605	08C013P605	5	S	3.875	S	A/A	T/G	T/C	C/C	A/A	G/G	G/G	A/A	A/A	G/G	A/A	A/A	T/G	A/A
08C013P606	08C013P606	2.25	R	2.25	R	A/G	G/G	C/C	T/C	A/G	A/G	A/G	A/G	A/C	T/G	NA	A/G	T/G	A/G
08C017P005	08C017P005	5	S	3.625	S	A/A	G/G	C/C	T/T	G/G	G/G	G/G	A/A	A/A	G/G	A/A	A/A	T/T	A/A
08C018P005	08C018P005	1.125	R	3.19318	S	A/G	T/G	T/C	T/C	NA	A/G	A/G	A/G	A/C	T/G	A/G	A/G	G/G	A/G
08C020P602	Petaluma	5	S	3.375	S	A/A	T/G	T/C	T/C	A/G	G/G	G/G	A/A	A/A	G/G	A/A	A/A	T/G	A/A
08C037P603	08C037P603	1	R	1.25	R	A/G	G/G	C/C	T/T	G/G	A/G	A/G	A/G	A/C	T/G	A/G	A/G	T/G	A/G
08C043P001	08C043P001	5	S	4.625	S	A/A	T/G	T/C	C/C	A/A	G/G	G/G	A/A	A/A	G/G	A/A	A/A	T/G	A/A
08C043P004	08C043P004	5	S	4.125	S	A/A	T/G	T/C	C/C	A/A	G/G	G/G	A/A	A/A	G/G	A/A	A/A	T/G	A/A
08C043P010	08C043P010	1	R	1.1505	R	A/G	G/G	C/C	T/C	A/G	A/G	A/G	A/G	A/C	T/G	A/G	A/G	T/G	A/G
08C055P002	Grenada	5	S	4	S	A/A	G/G	C/C	T/C	A/G	G/G	G/G	A/A	A/A	G/G	A/A	A/A	T/T	A/A
08C075P001	08C075P001	5	S	4.25	S	A/A	T/T	T/T	C/C	A/A	G/G	G/G	A/A	A/A	G/G	A/A	A/A	G/G	A/A
08C114P005	08C114P005	5	S	3	S	A/A	T/G	T/C	T/C	A/G	G/G	G/G	A/A	A/A	G/G	A/A	A/A	T/G	A/A
08C123P001	08C123P001	5	S	4	S	A/A	T/G	T/C	C/C	A/A	G/G	G/G	A/A	A/A	G/G	A/A	A/A	T/T	A/A
08C124P001	08C124P001	4.25	S	3.25	S	A/A	T/G	T/C	C/C	A/A	G/G	G/G	A/A	A/A	G/G	A/A	A/A	T/G	A/A
08C128P002	08C128P002	1	R	1	R	A/G	G/G	C/C	T/C	A/G	A/G	A/G	A/G	A/C	T/G	A/G	A/G	T/G	A/G
08C129P004	08C129P004	4.25	S	2.875	S	A/A	T/G	T/C	C/C	A/A	G/G	G/G	A/A	A/A	G/G	A/A	A/A	T/G	A/A
08C131P003	08C131P003	1	R	1.375	R	A/G	G/G	C/C	T/T	G/G	A/G	A/G	A/G	A/C	T/G	A/G	A/G	T/G	A/G
08C132P003	08C132P003	5	S	2.5	R	A/A	T/G	T/C	C/C	A/A	G/G	G/G	A/A	A/A	G/G	A/A	A/A	T/G	A/A
08C132P608	Fronteras	1.08696	R	1.825	R	A/G	T/G	T/C	T/C	A/G	A/G	A/G	A/G	A/C	T/G	A/G	A/G	G/G	A/G
08C135P004	08C135P004	5	S	4.75	S	A/A	T/T	T/T	C/C	A/A	G/G	G/G	A/A	A/A	G/G	A/A	A/A	G/G	A/A
08C137P001	08C137P001	5	S	3.125	S	A/A	T/G	T/C	T/C	A/G	G/G	G/G	A/A	A/A	G/G	A/A	A/A	T/G	A/A
08C137P002	08C137P002	5	S	3	S	A/A	T/G	T/C	T/C	A/G	G/G	G/G	A/A	A/A	G/G	A/A	A/A	T/G	A/A
08C138P003	08C138P003	1	R	1	R	A/G	G/G	C/C	T/T	G/G	A/G	A/G	A/G	A/C	T/G	A/G	A/G	T/G	A/G
08C150P009	08C150P009	5	S	4.75	S	A/A	T/G	T/C	T/C	A/G	G/G	G/G	A/A	A/A	G/G	A/A	A/A	T/G	A/A
08C181P001	Cabrillo	5	S	3.75	S	A/A	T/G	T/C	T/C	A/G	G/G	G/G	A/A	A/A	G/G	A/A	A/A	T/G	A/A
08C182P002	08C182P002	5	S	3.5	S	A/A	G/G	C/C	T/C	A/G	G/G	G/G	A/A	A/A	G/G	A/A	A/A	T/T	A/A
09C012P605	09C012P605	5	S	3.875	S	A/A	G/G	C/C	T/C	A/G	G/G	G/G	A/A	A/A	G/G	A/A	A/A	T/T	A/A
09C016P601	09C016P601	1	R	1.125	R	A/G	G/G	C/C	T/T	G/G	A/G	A/G	A/G	A/C	T/G	A/G	A/G	T/G	A/G
09C020P609	09C020P609	1	R	1.51829	R	A/G	T/G	T/C	T/C	A/G	A/G	A/G	A/G	A/C	T/G	A/G	A/G	G/G	A/G
09C032P605	09C032P605	5	S	4.18496	S	A/A	T/G	T/C	T/C	A/G	G/G	G/G	A/A	A/A	G/G	A/A	A/A	T/G	A/A
09C037P001	09C037P001	5	S	2.375	R	A/A	G/G	C/C	T/C	A/G	G/G	G/G	A/A	A/A	G/G	A/A	A/A	T/T	A/A
09C048P003	09C048P003	1	R	1.18496	R	A/G	T/G	T/C	T/C	A/G	A/G	A/G	A/G	A/C	T/G	A/G	A/G	T/G	A/G
09C056P608	09C056P608	5	S	3.625	S	A/A	T/G	T/C	C/C	A/A	G/G	G/G	A/A	A/A	G/G	A/A	A/A	T/G	A/A
09C061P602	09C061P602	1	R	1.375	R	A/G	T/G	T/C	T/C	A/G	A/G	A/G	A/G	A/C	T/G	A/G	A/G	G/G	A/G
09C061P606	09C061P606	1	R	1.25	R	A/G	T/G	T/C	T/C	A/G	A/G	A/G	A/G	A/C	T/G	A/G	A/G	G/G	A/G
09C062P001	09C062P001	1	R	1.875	R	A/G	T/G	T/C	T/C	A/G	A/G	A/G	A/G	A/C	T/G	A/G	A/G	G/G	A/G
09C068P602	09C068P602	5	S	3.125	S	A/A	T/G	T/C	T/C	A/G	G/G	G/G	A/A	A/A	G/G	A/A	A/A	T/G	A/A
09C078P603	09C078P603	5	S	5	S	A/A	T/G	T/C	C/C	A/A	G/G	G/G	A/A	A/A	G/G	A/A	A/A	T/G	A/A
09C085P002	09C085P002	2.875	S	2.375	R	A/A	T/G	T/C	T/C	A/G	G/G	G/G	A/A	A/A	G/G	NA	A/A	T/G	A/A
09C085P601	09C085P601	5	S	4	S	A/A	T/G	T/C	T/C	A/G	G/G	G/G	A/A	A/A	G/G	A/A	A/A	T/G	A/A
09C088P602	09C088P602	1	R	1.51829	R	G/G	G/G	C/C	T/T	G/G	A/G	A/A	G/G	C/C	T/T	G/G	A/G	G/G	A/G
09C091P001	09C091P001	1	R	1.125	R	A/G	T/G	T/C	T/C	A/G	A/G	A/G	A/G	A/C	T/G	A/G	A/A	G/G	A/A
09C097P003	09C097P003	1	R	1.375	R	A/G	G/G	C/C	T/T	G/G	A/G	A/G	A/G	A/C	T/G	A/G	A/A	T/G	A/A
09C100P003	09C100P003	5	S	2.625	S	A/A	T/G	T/C	T/C	A/G	G/G	G/G	A/A	A/A	G/G	A/A	A/A	T/T	A/A
09C103P002	09C103P002	5	S	2.75	S	A/A	T/G	T/C	T/C	A/G	G/G	G/G	A/A	A/A	G/G	A/A	A/A	T/T	A/A
09C108P002	09C108P002	5	S	3.875	S	A/A	T/G	T/C	T/C	A/G	G/G	G/G	A/A	A/A	G/G	A/A	A/A	T/T	A/A
09C132P003	09C132P003	1	R	2	R	A/G	T/G	T/C	T/C	A/G	A/G	A/G	A/G	A/C	T/G	A/G	A/G	G/G	A/G
09C141P001	09C141P001	1	R	1.25	R	A/G	T/G	T/C	T/C	A/G	A/G	A/G	A/G	A/C	T/G	A/G	A/G	G/G	A/G
09C154P605	09C154P605	5	S	4.5	S	A/A	T/G	T/C	C/C	A/A	G/G	G/G	A/A	A/A	G/G	A/A	A/A	T/G	A/A
09C166P007	09C166P007	5	S	4	S	A/A	T/G	T/C	C/C	A/A	G/G	G/G	A/A	A/A	G/G	A/A	A/A	NA	A/A
09C171P602	09C171P602	5	S	4	S	A/A	T/G	T/C	T/C	A/G	G/G	G/G	A/A	A/A	G/G	A/A	A/A	T/G	A/A
09C180P001	09C180P001	3.75	S	2.75	S	A/A	G/G	C/C	C/C	A/A	G/G	G/G	A/A	A/A	G/G	A/A	NA	T/G	A/A
10C001P604	10C001P604	5	S	3	S	A/A	T/G	T/C	T/C	A/G	G/G	G/G	A/A	A/A	G/G	A/A	A/A	T/G	A/A
10C005P602	10C005P602	1	R	1.25	R	A/G	G/G	C/C	T/T	G/G	A/G	A/G	A/G	A/A	G/G	A/A	A/A	T/G	A/A
10C007P003	10C007P003	1	R	1.25	R	A/G	G/G	C/C	T/T	G/G	A/G	A/G	A/G	A/C	T/G	A/G	A/G	NA	A/G
10C012P003	10C012P003	4.5	S	3.875	S	A/A	T/G	T/C	T/C	A/G	G/G	G/G	A/A	A/A	G/G	A/A	A/A	T/G	A/A
10C015P605	10C015P605	1	R	1	R	A/G	T/G	T/C	T/C	A/G	A/G	A/G	A/G	A/C	T/G	A/G	A/G	NA	A/G
10C017P001	10C017P001	1	R	1	R	G/G	G/G	C/C	T/T	G/G	A/A	A/A	G/G	A/C	T/G	A/G	A/G	G/G	A/G
10C017P002	10C017P002	1	R	1.25	R	G/G	G/G	C/C	T/T	G/G	NA	A/A	G/G	A/C	T/G	A/G	A/G	G/G	A/G
10C023P001	10C023P001	5	S	4.125	S	A/A	T/G	T/C	T/C	A/G	G/G	G/G	A/A	A/A	G/G	A/A	A/A	T/G	A/A
10C024P002	10C024P002	5	S	3.875	S	A/A	G/G	C/C	T/C	A/G	G/G	G/G	A/A	A/A	G/G	A/A	A/A	T/T	A/A
10C025P601	10C025P601	5	S	3.875	S	A/A	G/G	C/C	T/T	G/G	G/G	G/G	A/A	A/A	G/G	A/A	A/A	T/T	A/A
10C030P001	10C030P001	5	S	3.5	S	A/A	T/G	T/C	T/C	A/G	G/G	G/G	A/A	A/A	G/G	A/A	A/A	T/G	A/A
10C031P602	10C031P602	5	S	3.125	S	A/A	T/T	T/T	C/C	A/A	G/G	G/G	A/A	A/A	G/G	A/A	A/A	G/G	A/A
10C037P604	10C037P604	5	S	4.125	S	A/A	G/G	C/C	T/C	A/G	G/G	G/G	A/A	A/A	G/G	A/A	A/A	T/T	A/A
10C038P601	10C038P601	3.5	S	3.375	S	A/A	T/G	T/C	T/C	A/G	G/G	G/G	A/A	A/A	G/G	A/A	A/A	T/G	A/A
10C070P611	10C070P611	5	S	3.75	S	A/A	G/G	C/C	T/T	G/G	G/G	G/G	A/A	A/A	G/G	A/A	A/A	T/T	A/A
10C077P601	10C077P601	5	S	4.625	S	A/A	G/G	C/C	T/C	A/G	G/G	G/G	A/A	A/A	G/G	A/A	A/A	T/T	A/A
10C078P603	10C078P603	5	S	4.5	S	A/A	G/G	C/C	T/T	G/G	G/G	G/G	A/A	A/A	G/G	A/A	A/A	T/T	A/A
10C080P605	10C080P605	5	S	2.875	S	A/A	T/G	T/C	T/C	A/G	G/G	G/G	A/A	A/A	G/G	A/A	A/A	T/G	A/A
10C081P001	10C081P001	5	S	3.75	S	A/A	T/G	T/C	T/C	A/G	G/G	G/G	A/A	A/A	G/G	A/A	A/A	T/G	A/A
10C087P002	10C087P002	5	S	4.25	S	A/A	T/G	T/C	T/C	A/G	G/G	G/G	A/A	A/A	G/G	A/A	A/A	T/G	A/A
10C099P001	10C099P001	5	S	3.875	S	A/A	G/G	C/C	T/T	G/G	G/G	G/G	A/A	A/A	G/G	A/A	A/A	T/T	A/A
10C105P001	10C105P001	1	R	1.25	R	A/G	T/G	T/C	T/C	A/G	A/G	A/G	A/G	A/C	T/G	A/G	A/G	G/G	A/G
10C106P001	10C106P001	1	R	1.375	R	A/G	G/G	C/C	T/C	A/G	A/G	A/G	A/G	A/C	T/G	A/G	A/G	T/T	A/G
10C106P008	10C106P008	5	S	3.125	S	A/A	T/G	T/C	T/C	A/G	G/G	G/G	A/A	A/A	G/G	A/A	A/A	T/G	A/A
10C116P001	10C116P001	4.75	S	2.75	S	A/A	G/G	C/C	T/C	A/G	G/G	G/G	A/A	A/A	G/G	A/A	A/A	T/T	A/A
10C122P003	10C122P003	1	R	1	R	A/G	G/G	C/C	T/C	A/G	A/G	A/G	A/G	A/C	T/G	A/G	A/G	T/G	A/G
10C122P006	10C122P006	1	R	1.25	R	A/G	G/G	C/C	T/C	A/G	A/G	A/G	A/G	A/C	T/G	A/G	A/G	T/G	A/G
10C124P002	10C124P002	5	S	2.75	S	A/A	T/G	T/C	T/C	A/G	G/G	G/G	A/A	A/A	G/G	A/A	A/A	T/T	A/A
10C126P003	10C126P003	5	S	4.75	S	A/A	T/T	T/T	C/C	NA	G/G	G/G	A/A	A/A	G/G	A/A	A/A	T/G	A/A
10C127P001	10C127P001	5	S	4.5	S	A/A	T/T	T/T	C/C	A/A	G/G	G/G	A/A	A/A	G/G	A/A	A/A	G/G	A/A
10C134P004	10C134P004	5	S	3.75	S	A/A	T/G	T/C	C/C	A/A	G/G	G/G	A/A	A/A	G/G	A/A	A/A	T/G	A/A
10C136P004	10C136P004	5	S	4.75	S	A/A	T/G	T/C	T/C	A/G	G/G	G/G	A/A	A/A	G/G	A/A	A/A	T/G	A/A
10C137P005	10C137P005	5	S	4.25	S	A/A	T/T	T/T	C/C	A/A	G/G	G/G	A/A	A/A	G/G	A/A	A/A	G/G	A/A
10C140P001	10C140P001	5	S	3.875	S	A/A	G/G	C/C	C/C	A/A	G/G	G/G	A/A	A/A	G/G	A/A	A/A	T/T	A/A
10C141P001	10C141P001	5	S	3	S	A/A	T/G	T/C	T/C	A/G	G/G	G/G	A/A	A/A	G/G	A/A	A/A	T/G	A/A
10C143P001	10C143P001	5	S	4	S	A/A	G/G	C/C	T/C	A/G	G/G	G/G	A/A	A/A	G/G	A/A	A/A	T/T	A/A
10C144P001	10C144P001	1	R	1	R	A/G	G/G	C/C	T/T	G/G	A/G	A/G	A/G	A/A	G/G	A/A	A/A	T/T	A/A
10C144P002	10C144P002	1	R	1.125	R	A/G	G/G	C/C	T/C	A/G	A/G	A/G	A/G	A/A	G/G	A/A	A/A	T/T	A/A
10C144P003	10C144P003	5	S	3.125	S	A/A	T/G	T/C	T/C	NA	G/G	G/G	A/A	A/A	G/G	A/A	A/A	T/G	A/A
10C160P001	10C160P001	1	R	1	R	A/G	G/G	C/C	T/T	G/G	A/G	A/G	A/G	A/C	T/G	A/G	A/G	T/G	A/G
10C160P009	10C160P009	5	S	3.75	S	A/A	T/G	T/C	T/C	A/G	G/G	G/G	A/A	A/A	G/G	A/A	A/A	T/G	A/A
10C169P001	10C169P001	5	S	4.625	S	A/A	G/G	C/C	T/C	G/G	G/G	G/G	A/A	A/A	G/G	A/A	A/A	T/G	A/A
10C187P004	10C187P004	1.125	R	1.125	R	A/G	G/G	C/C	T/C	A/G	A/G	A/G	A/G	A/C	T/G	A/G	A/G	T/G	A/G
11C021P001	11C021P001	1.125	R	1.125	R	A/G	T/G	T/C	T/C	A/G	A/G	A/G	A/G	A/A	G/G	A/A	A/A	T/G	A/A
11C032P002	11C032P002	5	S	4.5	S	A/A	T/G	T/C	T/C	A/G	G/G	G/G	A/A	A/A	G/G	A/A	A/A	T/G	A/A
11C034P605	11C034P605	5	S	4.75	S	A/A	G/G	C/C	T/T	G/G	G/G	G/G	A/A	A/A	G/G	A/A	A/A	NA	A/A
11C036P601	11C036P601	4.125	S	2.75	S	A/A	T/G	T/C	T/C	A/G	G/G	G/G	A/A	A/A	G/G	A/A	A/A	T/G	A/A
11C039P001	11C039P001	5	S	5	S	A/A	G/G	C/C	T/C	A/G	G/G	G/G	A/A	A/A	G/G	A/A	A/A	T/T	A/A
11C049P006	11C049P006	5	S	1.5	R	A/A	T/T	T/T	C/C	A/A	G/G	G/G	A/A	A/A	G/G	A/A	A/A	G/G	A/A
11C050P001	11C050P001	1	R	1.625	R	A/G	T/G	T/C	T/C	A/G	A/G	A/G	A/G	A/C	T/G	A/G	A/G	G/G	A/G
11C051P001	11C051P001	5	S	3.875	S	A/A	T/G	T/C	C/C	NA	G/G	G/G	A/A	A/A	G/G	A/A	A/A	T/G	A/A
11C055P004	11C055P004	1	R	2	R	A/G	T/G	T/C	T/C	A/G	A/G	A/G	A/G	A/C	T/G	A/G	A/G	G/G	A/G
11C057P001	11C057P001	1	R	1.18496	R	A/G	G/G	C/C	T/C	A/G	A/G	A/G	A/G	A/C	T/G	A/G	A/G	T/G	A/G
11C062P603	11C062P603	5	S	2.75	S	A/A	G/G	C/C	T/C	A/G	G/G	G/G	A/A	A/A	G/G	A/A	A/A	T/T	A/A
11C067P001	11C067P001	5	S	2.75	S	A/A	G/G	C/C	T/T	G/G	G/G	G/G	A/A	A/A	G/G	A/A	A/A	T/T	A/A
11C071P601	11C071P601	5	S	2.875	S	A/A	T/G	T/C	C/C	A/A	G/G	G/G	A/A	A/A	G/G	A/A	A/A	T/G	A/A
11C080P002	11C080P002	4.75	S	3.375	S	A/A	G/G	C/C	T/C	A/G	G/G	G/G	A/A	A/A	G/G	A/A	A/A	T/T	A/A
11C103P001	11C103P001	4.25	S	4.75	S	A/A	T/T	T/T	C/C	A/A	G/G	G/G	A/A	A/A	G/G	A/A	A/A	G/G	A/A
11C103P003	11C103P003	5	S	4.625	S	A/A	T/T	T/T	C/C	A/A	G/G	G/G	A/A	A/A	G/G	A/A	A/A	G/G	A/A
11C103P005	11C103P005	1	R	1.25	R	A/G	T/G	T/C	T/C	A/G	A/G	A/G	A/G	A/C	T/G	A/G	A/G	G/G	A/G
11C105P001	11C105P001	5	S	4	S	A/A	T/T	T/T	C/C	A/A	G/G	G/G	A/A	A/A	G/G	A/A	A/A	G/G	A/A
11C107P005	11C107P005	5	S	4.625	S	A/A	T/T	NA	C/C	A/A	G/G	G/G	A/A	A/A	G/G	A/A	A/A	G/G	A/A
11C109P002	11C109P002	5	S	4.875	S	A/A	T/T	T/T	C/C	A/A	G/G	G/G	A/A	A/A	G/G	A/A	A/A	G/G	A/A
11C109P003	11C109P003	4.33333	S	3.5	S	A/A	T/T	T/T	C/C	A/A	G/G	G/G	A/A	A/A	G/G	A/A	A/A	G/G	A/A
11C110P003	11C110P003	5	S	4.25	S	A/A	T/T	T/T	C/C	A/A	G/G	G/G	A/A	A/A	G/G	A/A	A/A	G/G	A/A
11C113P006	11C113P006	5	S	4	S	A/A	G/G	C/C	T/C	A/G	G/G	G/G	A/A	A/A	G/G	A/A	A/A	T/T	A/A
11C115P003	11C115P003	5	S	4.75	S	A/A	T/G	T/C	C/C	A/A	G/G	G/G	A/A	A/A	G/G	A/A	A/A	T/G	A/A
11C116P001	11C116P001	5	S	3.875	S	A/A	T/G	T/C	C/C	A/A	G/G	G/G	A/A	A/A	G/G	A/A	A/A	T/G	A/A
11C129P002	11C129P002	1	R	1	R	A/G	T/G	T/C	T/C	A/G	A/G	A/G	A/G	A/A	G/G	A/A	A/A	G/G	A/A
11C141P001	11C141P001	1	R	1.5	R	A/G	G/G	C/C	T/C	A/G	A/G	A/G	A/G	A/C	T/G	A/G	A/G	T/G	A/G
11C145P001	11C145P001	1	R	2	R	A/G	G/G	C/C	T/C	A/G	A/G	A/G	A/G	A/C	T/G	A/G	A/G	T/G	A/G
11C151P003	11C151P003	5	S	4.5	S	A/A	T/G	T/C	T/C	A/G	G/G	G/G	A/A	A/A	G/G	A/A	A/A	T/G	A/A
11C151P008	11C151P008	5	S	4	S	A/G	T/G	T/C	T/C	A/G	A/G	A/G	A/G	A/C	T/G	A/G	A/G	G/G	A/G
11C153P002	11C153P002	1.125	R	1.51829	R	A/G	G/G	C/C	T/T	G/G	A/G	A/G	A/G	A/C	T/G	A/G	A/G	T/G	A/G
11C153P003	11C153P003	5	S	4.5	S	A/A	T/T	T/T	C/C	A/G	G/G	G/G	A/A	A/A	G/G	A/A	A/A	G/G	A/A
11C154P005	11C154P005	5	S	3.75	S	A/A	T/G	T/C	T/C	A/G	G/G	G/G	A/A	A/A	G/G	A/A	A/A	NA	A/A
11C157P001	11C157P001	1	R	1.125	R	A/G	G/G	C/C	T/C	A/G	A/G	A/G	NA	A/A	G/G	A/A	A/A	NA	A/A
11C158P001	11C158P001	5	S	3.75	S	A/A	T/G	T/C	C/C	A/A	G/G	G/G	A/A	A/A	G/G	A/A	A/A	T/G	A/A
11C167P004	11C167P004	1	R	1.375	R	A/G	G/G	C/C	T/C	A/G	A/G	A/G	A/G	A/C	T/G	A/G	A/G	T/G	A/G
11C179P003	11C179P003	1.75	R	1.125	R	A/G	G/G	C/C	T/T	G/G	A/G	A/G	A/G	A/C	T/G	A/G	A/G	T/G	A/G
11C180P001	11C180P001	5	S	4.625	S	A/A	T/G	T/C	T/C	A/G	G/G	G/G	A/A	A/A	G/G	A/A	A/A	T/G	A/A
11C181P002	11C181P002	5	S	5	S	A/A	T/G	T/C	T/C	A/G	G/G	G/G	A/A	A/A	G/G	A/A	A/A	T/G	A/A
11C190P003	11C190P003	5	S	4.5	S	A/A	T/G	T/C	T/C	A/G	G/G	G/G	A/A	A/A	G/G	A/A	A/A	T/G	A/A
11C195P003	11C195P003	1.125	R	1.375	R	A/G	G/G	C/C	T/T	G/G	A/G	A/G	A/G	A/C	T/G	A/G	A/A	T/G	A/A
12C001P605	12C001P605	5	S	3	S	A/A	T/T	T/T	C/C	A/A	G/G	G/G	A/A	A/A	G/G	A/A	A/A	NA	A/A
12C001P614	12C001P614	1	R	1.48384	R	A/G	T/G	T/C	T/C	A/G	A/G	A/G	A/G	A/C	T/G	A/G	A/G	G/G	A/G
12C002P006	12C002P006	5	S	5	S	A/A	T/G	T/C	C/C	A/A	G/G	G/G	A/A	A/A	G/G	A/A	A/A	T/G	A/A
12C002P605	12C002P605	5	S	3.75	S	A/A	T/T	T/T	C/C	A/A	G/G	G/G	A/A	A/A	G/G	A/A	A/A	G/G	A/A
12C003P610	12C003P610	5	S	4.97136	S	A/A	T/G	T/C	C/C	A/A	G/G	G/G	A/A	A/A	G/G	A/A	A/A	T/G	A/A
12C004P001	12C004P001	4.75	S	3.125	S	A/A	T/G	T/C	T/C	A/G	G/G	G/G	A/A	A/A	G/G	A/A	A/A	T/G	A/A
12C004P602	12C004P602	1.125	R	1.125	R	A/G	T/G	T/C	T/C	NA	A/G	A/G	A/G	A/C	T/G	A/G	A/G	G/G	A/G
12C005P001	12C005P001	1	R	1.125	R	G/G	G/G	C/C	T/T	G/G	A/A	NA	G/G	C/C	T/T	G/G	G/G	G/G	G/G
12C006P001	12C006P001	1	R	1.375	R	A/G	G/G	C/C	T/C	A/G	A/G	A/G	A/G	A/C	T/G	A/G	A/G	T/G	A/G
12C006P601	12C006P601	1	R	1.25	R	A/G	G/G	C/C	T/C	A/G	A/G	A/G	A/G	A/C	T/G	A/G	A/G	T/G	A/G
12C007P004	12C007P004	5	S	4.625	S	A/A	T/T	T/T	C/C	A/A	G/G	G/G	A/A	A/A	G/G	A/A	A/A	G/G	A/A
12C007P601	12C007P601	5	S	4.375	S	A/A	T/T	T/T	C/C	A/A	G/G	G/G	A/A	A/A	G/G	A/A	A/A	G/G	A/A
12C008P002	12C008P002	1	R	1	R	A/G	T/G	T/C	T/C	A/G	A/G	A/G	A/G	A/C	T/G	A/G	A/G	G/G	A/G
12C008P607	12C008P607	5	S	5	S	A/A	T/T	T/T	C/C	A/A	G/G	G/G	A/A	A/A	G/G	A/A	A/A	G/G	A/A
12C009P002	12C009P002	5	S	4.75	S	A/A	T/G	T/C	C/C	A/A	G/G	G/G	A/A	A/A	G/G	A/A	A/A	T/G	A/A
12C009P605	12C009P605	1.125	R	1.5	R	A/G	T/G	T/C	T/C	NA	A/G	A/G	A/G	A/C	T/G	A/G	A/G	G/G	A/G
12C010P603	12C010P603	1	R	1	R	NA	G/G	C/C	T/T	G/G	A/A	A/A	NA	C/C	T/T	G/G	G/G	G/G	A/G
12C011P003	12C011P003	5	S	4.125	S	A/A	T/G	T/C	T/C	A/G	G/G	G/G	A/A	A/A	G/G	A/A	A/A	T/G	A/A
12C012P001	12C012P001	1.25	R	1	R	NA	G/G	C/C	T/T	G/G	A/A	A/A	NA	C/C	T/T	G/G	G/G	G/G	G/G
12C013P001	12C013P001	1.125	R	1	R	A/G	T/G	T/C	T/C	A/G	A/G	A/G	A/G	A/C	T/G	A/G	A/G	G/G	A/G
12C013P601	12C013P601	5	S	2.5	R	A/A	G/G	C/C	T/C	NA	G/G	G/G	A/A	A/A	G/G	A/A	A/A	T/T	A/A
12C014P001	12C014P001	1	R	1.125	R	G/G	G/G	C/C	T/T	G/G	A/A	A/A	G/G	C/C	T/T	G/G	G/G	G/G	G/G
12C017P601	12C017P601	5	S	5	S	A/A	T/G	T/C	C/C	A/A	G/G	G/G	A/A	A/A	G/G	A/A	A/A	T/G	A/A
12C018P001	12C018P001	4.5	S	3.375	S	A/A	T/G	T/C	C/C	A/A	G/G	G/G	A/A	A/A	G/G	A/A	A/A	T/G	A/A
12C018P601	12C018P601	5	S	3.625	S	A/A	T/G	T/C	C/C	A/A	G/G	G/G	A/A	A/A	G/G	A/A	A/A	T/G	A/A
12C020P001	12C020P001	1	R	1.875	R	A/G	G/G	C/C	T/C	A/G	A/G	A/G	A/G	A/C	T/G	A/G	A/G	T/G	A/G
12C021P001	12C021P001	1	R	1.375	R	G/G	G/G	C/C	T/T	G/G	A/A	A/A	G/G	C/C	T/T	G/G	G/G	G/G	G/G
12C021P601	12C021P601	1	R	1.25	R	A/G	T/G	T/C	T/C	A/G	A/G	A/G	A/G	A/C	T/G	A/G	A/G	G/G	A/G
12C022P602	12C022P602	4.25	S	2.25	R	A/A	T/G	T/C	T/C	A/G	G/G	G/G	A/A	A/A	G/G	A/A	A/A	T/G	A/A
12C023P604	12C023P604	1.125	R	1.25	R	A/G	T/G	T/C	T/C	A/G	A/G	A/G	A/G	A/C	T/G	A/G	A/G	G/G	A/G
12C023P605	12C023P605	1	R	1.375	R	A/G	T/G	T/C	T/C	A/G	A/G	A/G	A/G	A/C	T/G	A/G	A/G	G/G	A/G
12C024P609	12C024P609	1	R	1.25	R	A/G	T/G	T/C	T/C	A/G	A/G	A/G	A/G	A/A	G/G	A/A	A/A	G/G	A/A
12C024P614	12C024P614	1	R	1.19318	R	A/G	T/G	T/C	T/C	A/G	A/G	A/G	NA	A/C	T/G	A/G	A/G	G/G	A/G
12C025P604	12C025P604	1	R	1.375	R	G/G	G/G	C/C	T/T	G/G	A/A	A/A	G/G	A/C	T/G	A/G	A/G	G/G	A/G
12C026P604	12C026P604	5	S	3.5	S	A/A	T/T	T/T	C/C	A/A	G/G	G/G	A/A	A/A	G/G	A/A	A/A	G/G	A/A
12C028P001	12C028P001	1	R	1.375	R	A/G	G/G	C/C	T/C	A/G	A/G	A/A	A/G	A/C	T/G	A/G	A/G	T/G	A/G
12C028P601	12C028P601	1	R	1.125	R	G/G	G/G	C/C	T/T	G/G	A/A	A/A	G/G	C/C	T/T	G/G	G/G	G/G	G/G
12C029P001	12C029P001	5	S	3.625	S	A/A	G/G	C/C	T/C	A/G	G/G	G/G	A/A	A/A	G/G	A/A	A/A	NA	A/A
12C029P601	12C029P601	1.125	R	1.125	R	A/G	G/G	C/C	T/T	G/G	NA	A/G	A/G	A/C	T/G	A/G	A/G	T/G	A/G
12C030P601	12C030P601	5	S	3.125	S	A/A	T/G	T/C	C/C	A/A	G/G	G/G	A/A	A/A	G/G	A/A	A/A	NA	A/A
12C031P003	12C031P003	1.125	R	1	R	A/G	G/G	C/C	T/T	G/G	A/G	A/G	A/G	A/C	T/G	NA	A/G	T/G	A/G
12C032P001	12C032P001	5	S	5	S	A/A	G/G	C/C	T/C	A/G	G/G	G/G	A/A	A/A	G/G	A/A	A/A	T/T	A/A
12C032P603	12C032P603	5	S	4	S	A/A	T/G	T/C	C/C	A/A	G/G	G/G	A/A	A/A	G/G	A/A	A/A	T/G	A/A
12C034P001	12C034P001	5	S	3.375	S	A/A	G/G	C/C	T/T	G/G	G/G	G/G	A/A	A/A	G/G	A/A	A/A	T/T	A/A
12C034P601	12C034P601	5	S	3.25	S	A/A	G/G	C/C	T/T	G/G	G/G	G/G	A/A	A/A	G/G	A/A	A/A	T/T	A/A
12C035P001	12C035P001	1	R	1.25	R	A/G	G/G	C/C	T/T	G/G	A/G	A/G	A/G	A/C	T/G	A/G	A/G	T/G	A/G
12C035P601	12C035P601	1	R	1.375	R	G/G	G/G	C/C	T/T	G/G	A/A	A/A	G/G	C/C	T/T	G/G	G/G	G/G	G/G
12C036P001	12C036P001	5	S	3.75	S	A/A	T/G	T/C	T/C	A/G	G/G	G/G	A/A	A/A	G/G	A/A	A/A	T/G	A/A
12C036P601	12C036P601	2.375	R	3.75	S	A/A	T/G	T/C	T/C	A/G	G/G	G/G	A/A	A/A	G/G	A/A	A/A	T/G	A/A
12C037P001	12C037P001	1.125	R	1.25	R	A/G	G/G	C/C	T/T	G/G	A/G	A/G	A/G	A/C	T/G	A/G	A/G	T/G	A/G
12C037P602	12C037P602	1.125	R	1.18496	R	A/G	G/G	C/C	T/T	G/G	A/G	A/G	A/G	A/C	T/G	A/G	A/G	T/G	A/G
12C038P001	12C038P001	5	S	5	S	A/A	T/G	T/C	T/C	A/G	G/G	G/G	A/A	A/A	G/G	A/A	A/A	T/G	A/A
12C038P602	12C038P602	1	R	1.125	R	A/G	G/G	C/C	T/T	G/G	A/G	A/G	A/G	A/C	T/G	A/G	A/G	T/G	A/G
12C039P601	12C039P601	1.125	R	1.35985	R	A/G	G/G	C/C	T/T	G/G	A/G	A/G	A/G	A/C	T/G	A/G	A/G	T/G	A/G
12C040P002	12C040P002	1	R	1.5	R	A/G	T/G	T/C	T/C	A/G	A/G	A/G	A/G	A/C	T/G	A/G	A/G	G/G	A/G
12C041P001	12C041P001	1	R	1.25	R	A/G	T/G	T/C	T/C	A/G	A/G	A/G	A/G	A/C	T/G	A/G	A/G	G/G	A/G
12C041P601	12C041P601	5	S	4	S	A/A	T/G	T/C	T/C	A/G	G/G	G/G	A/A	A/A	G/G	A/A	A/A	T/G	A/A
12C042P602	12C042P602	5	S	3.75	S	A/A	T/T	T/T	C/C	A/A	G/G	G/G	A/A	A/A	G/G	A/A	A/A	G/G	A/A
12C043P003	12C043P003	5	S	3.25	S	A/A	T/G	T/C	T/C	A/G	G/G	G/G	A/A	A/A	G/G	A/A	A/A	T/G	A/A
12C044P002	12C044P002	5	S	4	S	A/A	T/T	T/T	C/C	A/A	G/G	G/G	A/A	A/A	G/G	A/A	A/A	G/G	A/A
12C046P001	12C046P001	5	S	2.25	R	A/A	G/G	C/C	T/C	A/A	G/G	G/G	A/A	A/A	G/G	A/A	A/A	T/T	A/A
12C047P601	12C047P601	3.625	S	2.625	S	A/A	G/G	C/C	T/C	A/G	G/G	G/G	A/A	A/A	G/G	A/A	A/A	T/T	A/A
12C048P002	12C048P002	1	R	1.75	R	A/G	T/G	T/C	T/C	A/G	A/G	A/G	A/G	A/C	T/G	A/G	A/G	G/G	A/G
12C048P603	12C048P603	1	R	1	R	A/G	T/G	T/C	T/C	A/G	A/G	A/G	A/G	A/C	T/G	A/G	A/G	G/G	A/G
12C049P001	12C049P001	3.5	S	3	S	A/A	G/G	C/C	T/C	A/G	G/G	G/G	A/A	A/A	G/G	A/A	A/A	T/T	A/A
12C049P601	12C049P601	5	S	3.375	S	A/A	T/G	T/C	T/C	A/G	G/G	G/G	A/A	A/A	G/G	A/A	A/A	T/T	A/A
12C050P002	12C050P002	5	S	3.75	S	A/A	T/T	T/T	C/C	A/A	G/G	G/G	A/A	A/A	G/G	A/A	A/A	G/G	A/A
12C050P603	12C050P603	5	S	3.5	S	A/A	T/G	T/C	T/C	A/G	G/G	G/G	A/A	A/A	G/G	A/A	A/A	T/G	A/A
12C052P002	12C052P002	5	S	3.375	S	A/A	T/G	T/C	T/C	A/G	G/G	G/G	A/A	A/A	G/G	A/A	A/A	T/G	A/A
12C052P601	12C052P601	4.5	S	3.5	S	A/A	G/G	C/C	T/T	G/G	G/G	G/G	A/A	A/A	G/G	A/A	A/A	T/T	A/A
12C053P601	12C053P601	2	R	2	R	A/G	G/G	C/C	T/T	G/G	A/G	A/G	A/G	A/C	T/G	A/G	A/G	T/G	A/G
12C054P601	12C054P601	5	S	4.375	S	A/A	T/G	T/C	T/C	A/G	G/G	G/G	A/A	A/A	G/G	A/A	A/A	T/G	A/A
12C055P001	12C055P001	1	R	1.625	R	A/G	T/G	T/C	T/C	A/G	A/G	A/G	A/G	A/C	T/G	A/G	A/G	G/G	A/G
12C055P601	12C055P601	4.375	S	3.875	S	A/A	T/G	T/C	T/C	A/G	G/G	G/G	A/A	A/A	G/G	A/A	A/A	T/G	A/A
12C056P002	12C056P002	4.25	S	4.75	S	A/A	T/G	T/C	T/C	A/G	G/G	G/G	A/A	A/A	G/G	A/A	A/A	T/G	A/A
12C056P601	12C056P601	5	S	4.5	S	A/A	G/G	C/C	T/T	G/G	G/G	G/G	A/A	A/A	G/G	A/A	A/A	T/T	A/A
12C058P601	12C058P601	1.125	R	1.375	R	A/G	T/G	T/C	T/C	NA	A/G	A/G	A/G	A/C	T/G	A/G	A/G	NA	A/G
12C059P602	12C059P602	1.25	R	1.125	R	A/G	T/G	T/C	T/C	A/G	A/G	A/G	A/G	A/C	T/G	A/G	A/G	G/G	A/G
12C060P602	12C060P602	1	R	1.125	R	A/G	T/G	T/C	T/C	A/G	A/G	A/G	A/G	A/C	T/G	A/G	A/G	G/G	A/G
12C061P605	12C061P605	5	S	2.875	S	A/A	T/G	T/C	C/C	A/A	G/G	G/G	A/A	A/A	G/G	A/A	A/A	T/G	A/A
12C063P602	12C063P602	5	S	4	S	A/A	T/T	T/T	C/C	A/A	G/G	G/G	A/A	A/A	G/G	A/A	A/A	G/G	A/A
12C064P001	12C064P001	1	R	1.5	R	A/G	G/G	C/C	T/T	G/G	A/G	A/G	A/G	A/C	T/G	A/G	A/G	T/G	A/G
12C065P001	12C065P001	5	S	4.375	S	A/A	T/G	T/C	T/C	A/G	G/G	G/G	A/A	A/A	G/G	A/A	A/A	T/G	A/A
12C065P602	12C065P602	5	S	3.875	S	NA	T/G	T/C	T/C	A/G	G/G	G/G	A/A	A/A	G/G	A/A	A/A	T/G	A/A
12C066P001	12C066P001	5	S	3.375	S	A/A	T/G	T/C	T/C	A/G	G/G	G/G	A/A	A/A	G/G	A/A	A/A	T/G	A/A
12C066P606	12C066P606	5	S	3.5	S	A/A	T/G	T/C	T/C	NA	G/G	G/G	A/A	A/A	G/G	A/A	A/A	T/G	A/A
12C067P001	12C067P001	5	S	4.375	S	A/A	T/G	T/C	T/C	A/G	G/G	G/G	A/A	A/A	G/G	A/A	A/A	T/G	A/A
12C067P601	12C067P601	4.625	S	3.625	S	A/A	G/G	C/C	T/C	A/G	G/G	G/G	A/A	A/A	G/G	A/A	A/A	T/T	A/A
12C068P002	12C068P002	5	S	5	S	A/A	T/G	T/C	T/C	A/G	G/G	G/G	A/A	A/A	G/G	A/A	A/A	T/G	A/A
12C068P601	12C068P601	5	S	2.25	R	A/A	T/G	T/C	T/C	NA	G/G	G/G	A/A	A/A	G/G	A/A	A/A	T/G	A/A
12C069P002	12C069P002	5	S	3.625	S	A/A	G/G	C/C	T/T	G/G	G/G	G/G	A/A	A/A	G/G	A/A	A/A	T/T	A/A
12C069P607	12C069P607	5	S	4.875	S	A/A	T/G	T/C	T/C	A/G	G/G	G/G	A/A	A/A	G/G	A/A	A/A	T/G	A/A
12C070P001	12C070P001	1.125	R	0.971355	R	A/G	T/G	T/C	T/C	A/G	A/G	A/G	A/G	A/C	T/G	A/G	A/G	G/G	A/G
12C070P004	12C070P004	5	S	4.625	S	A/A	T/T	T/T	C/C	A/A	G/G	G/G	A/A	A/A	G/G	A/A	A/A	G/G	A/A
12C070P602	12C070P602	1	R	1.125	R	A/G	T/G	T/C	T/C	A/G	A/G	A/G	A/G	A/C	T/G	A/G	A/G	G/G	A/G
12C071P001	12C071P001	1	R	2.52651	S	A/G	T/G	T/C	T/C	A/G	A/G	A/G	NA	A/C	T/G	A/G	A/G	G/G	A/G
12C071P602	12C071P602	5	S	2.75	S	A/A	T/T	T/T	C/C	A/A	G/G	G/G	A/A	A/A	G/G	A/A	A/A	G/G	A/A
12C072P001	12C072P001	1	R	3.56721	S	G/G	G/G	C/C	T/T	G/G	NA	A/A	G/G	C/C	T/T	G/G	G/G	G/G	G/G
12C072P606	12C072P606	1	R	1.125	R	G/G	G/G	C/C	T/T	G/G	A/A	A/A	G/G	C/C	T/T	G/G	G/G	G/G	G/G
12C073P001	12C073P001	5	S	4.875	S	A/A	T/G	T/C	C/C	A/A	G/G	G/G	A/A	A/A	G/G	A/A	A/A	T/G	A/A
12C073P602	12C073P602	5	S	5	S	A/A	T/T	T/T	C/C	A/A	G/G	G/G	A/A	A/A	G/G	A/A	A/A	G/G	A/A
12C074P601	12C074P601	5	S	3.125	S	A/A	T/G	T/C	C/C	A/A	G/G	G/G	A/A	A/A	G/G	A/A	A/A	T/G	A/A
12C075P001	12C075P001	1	R	1.125	R	A/G	G/G	C/C	T/T	G/G	A/G	A/G	A/G	A/C	T/G	A/G	A/G	T/G	A/G
12C075P601	12C075P601	5	S	4.625	S	A/A	T/G	T/C	T/C	A/G	G/G	G/G	A/A	A/A	G/G	A/A	A/A	T/G	A/A
12C076P001	12C076P001	5	S	3.75	S	A/A	T/G	T/C	C/C	A/A	G/G	G/G	A/A	A/A	G/G	A/A	A/A	T/G	A/A
12C077P601	12C077P601	5	S	4.25	S	A/A	T/G	T/C	C/C	A/A	G/G	G/G	A/A	A/A	G/G	A/A	A/A	T/G	A/A
12C078P602	12C078P602	1	R	3.80469	S	A/G	G/G	C/C	T/C	A/G	A/G	A/G	A/G	A/C	T/G	A/G	A/G	T/G	A/G
12C079P001	12C079P001	5	S	4.5	S	A/A	T/G	T/C	C/C	A/A	G/G	G/G	A/A	A/A	G/G	A/A	A/A	T/G	A/A
12C080P002	12C080P002	4.75	S	3.125	S	A/A	G/G	C/C	T/C	A/G	G/G	G/G	A/A	A/A	G/G	A/A	A/A	T/T	A/A
12C081P001	12C081P001	5	S	3.75	S	A/A	T/G	T/C	C/C	A/A	G/G	G/G	A/A	A/A	G/G	A/A	A/A	T/G	A/A
12C082P001	12C082P001	5	S	4.625	S	A/A	T/G	T/C	T/C	A/G	G/G	G/G	A/A	A/A	G/G	A/A	A/A	T/G	A/A
12C082P602	12C082P602	5	S	3.25	S	A/A	T/G	T/C	C/C	A/A	G/G	G/G	A/A	A/A	G/G	A/A	A/A	T/G	A/A
12C083P003	12C083P003	5	S	3.375	S	A/A	T/G	T/C	C/C	A/A	G/G	G/G	A/A	A/A	G/G	A/A	A/A	T/G	A/A
12C083P602	12C083P602	5	S	3.75	S	A/A	T/G	T/C	C/C	A/A	G/G	G/G	A/A	A/A	G/G	A/A	A/A	T/G	A/A
12C084P002	12C084P002	5	S	3.5	S	A/A	T/G	T/C	C/C	A/A	G/G	G/G	A/A	A/A	G/G	A/A	A/A	T/G	A/A
12C084P606	12C084P606	1.125	R	1.68496	R	A/G	G/G	C/C	T/T	G/G	A/G	A/G	A/G	A/C	T/G	A/G	A/G	T/G	A/G
12C085P001	12C085P001	5	S	4.875	S	A/A	G/G	C/C	T/C	A/G	G/G	G/G	A/A	A/A	G/G	A/A	A/A	T/T	A/A
12C085P601	12C085P601	5	S	4.625	S	A/A	T/G	T/C	C/C	A/A	G/G	G/G	A/A	A/A	G/G	A/A	A/A	T/G	A/A
12C087P602	12C087P602	5	S	4.375	S	A/A	G/G	C/C	T/T	G/G	G/G	G/G	A/A	A/A	G/G	A/A	A/A	NA	A/A
12C088P001	12C088P001	1.375	R	1.51829	R	A/G	T/G	T/C	T/C	A/G	A/G	A/G	A/G	A/C	T/G	A/G	A/G	G/G	A/G
12C088P804	12C088P804	1	R	1.25	R	A/G	T/G	T/C	T/C	A/G	A/A	A/G	A/G	A/C	T/G	A/G	A/G	G/G	A/G
12C089P002	12C089P002	5	S	4	S	A/A	T/T	T/T	C/C	A/A	G/G	G/G	A/A	A/A	G/G	A/A	A/A	G/G	A/A
12C089P602	12C089P602	4.625	S	4.75	S	A/A	T/T	T/T	C/C	A/A	G/G	G/G	A/A	A/A	G/G	A/A	A/A	G/G	A/A
12C090P603	12C090P603	5	S	5	S	A/A	T/T	T/T	C/C	A/A	G/G	G/G	A/A	A/A	G/G	A/A	A/A	G/G	A/A
12C091P001	12C091P001	5	S	5	S	A/A	T/G	T/C	C/C	A/A	G/G	G/G	A/A	A/A	G/G	A/A	A/A	T/G	A/A
12C091P601	12C091P601	5	S	4.375	S	A/A	T/G	T/C	C/C	A/A	G/G	G/G	A/A	A/A	G/G	A/A	A/A	T/G	A/A
12C092P602	12C092P602	5	S	4.375	S	A/A	T/G	T/C	T/C	A/G	G/G	G/G	A/A	A/A	G/G	A/A	A/A	T/G	A/A
12C093P604	12C093P604	5	S	3.125	S	A/A	T/G	T/C	T/C	A/G	G/G	G/G	A/A	A/A	G/G	A/A	A/A	T/G	A/A
12C094P604	12C094P604	5	S	2.625	S	A/A	G/G	C/C	T/T	G/G	G/G	G/G	A/A	A/A	G/G	A/A	A/A	T/T	A/A
12C095P002	12C095P002	1	R	1.125	R	A/G	T/G	T/C	T/C	A/G	A/G	A/G	A/G	A/C	T/G	A/G	A/G	G/G	A/G
12C095P602	12C095P602	5	S	4.625	S	A/A	T/G	T/C	T/C	A/G	G/G	G/G	A/A	A/A	G/G	A/A	A/A	T/G	A/A
12C096P002	12C096P002	5	S	5	S	A/A	G/G	C/C	T/T	G/G	G/G	G/G	A/A	A/A	G/G	A/A	A/A	T/T	A/A
12C096P602	12C096P602	5	S	3.875	S	A/A	G/G	C/C	T/T	G/G	G/G	G/G	A/A	A/A	G/G	A/A	A/A	T/T	A/A
12C097P003	12C097P003	5	S	5	S	A/A	T/G	T/C	C/C	A/A	G/G	G/G	A/A	A/A	G/G	A/A	A/A	T/G	A/A
12C097P602	12C097P602	5	S	4.375	S	A/A	T/G	T/C	C/C	A/A	G/G	G/G	A/A	A/A	G/G	A/A	A/A	T/G	A/A
12C097P605	12C097P605	5	S	3.625	S	A/A	T/G	T/C	C/C	A/A	G/G	G/G	A/A	A/A	G/G	A/A	A/A	T/G	A/A
12C098P001	12C098P001	5	S	5	S	A/A	T/T	T/T	C/C	A/A	G/G	G/G	A/A	A/A	G/G	A/A	A/A	T/G	A/A
12C099P003	12C099P003	1	R	1.19318	R	A/G	G/G	C/C	T/C	NA	A/G	A/G	A/G	A/C	T/G	A/G	A/G	T/G	A/G
12C100P002	12C100P002	1	R	1.5	R	A/G	T/G	T/C	T/C	A/G	A/G	A/G	A/G	A/C	T/G	NA	A/G	T/G	A/G
12C104P001	12C104P001	5	S	3.625	S	A/A	G/G	C/C	T/C	A/G	G/G	G/G	A/A	A/A	G/G	A/A	A/A	T/T	A/A
12C104P004	12C104P004	5	S	4.25	S	A/A	T/G	T/C	C/C	A/A	G/G	G/G	A/A	A/A	G/G	A/A	A/A	T/G	A/A
12C104P005	12C104P005	5	S	3.375	S	A/A	T/G	T/C	C/C	A/A	G/G	G/G	A/A	A/A	G/G	A/A	A/A	T/G	A/A
12C104P006	12C104P006	5	S	5	S	A/A	T/G	T/C	C/C	A/A	G/G	G/G	A/A	A/A	G/G	A/A	A/A	T/G	A/A
12C104P007	12C104P007	5	S	4.75	S	A/A	G/G	C/C	T/C	A/G	G/G	G/G	A/A	A/A	G/G	A/A	A/A	T/T	A/A
12C105P002	12C105P002	5	S	4.25	S	A/A	T/G	T/C	T/C	A/G	G/G	G/G	A/A	A/A	G/G	A/A	A/A	T/T	A/A
12C105P004	12C105P004	5	S	4.625	S	A/A	T/T	T/T	C/C	A/A	G/G	G/G	A/A	A/A	G/G	A/A	A/A	T/G	A/A
12C105P010	12C105P010	5	S	4.68496	S	A/A	G/G	C/C	T/C	A/G	G/G	G/G	A/A	A/A	G/G	A/A	A/A	T/T	A/A
12C106P006	12C106P006	1.25	R	1	R	A/G	G/G	C/C	T/T	G/G	A/G	A/G	A/G	A/C	T/G	NA	A/G	T/G	A/G
12C107P001	12C107P001	5	S	4.75	S	A/A	T/G	T/C	T/C	A/G	G/G	G/G	A/A	A/A	G/G	A/A	A/A	T/G	A/A
12C108P003	12C108P003	5	S	3.75	S	A/A	G/G	C/C	T/C	A/G	G/G	G/G	A/A	A/A	G/G	A/A	A/A	T/T	A/A
12C108P004	12C108P004	5	S	4.25	S	A/A	T/T	T/T	C/C	A/A	G/G	G/G	A/A	A/A	G/G	A/A	A/A	G/G	A/A
12C109P002	12C109P002	5	S	4.5	S	A/A	T/T	T/T	C/C	A/A	G/G	G/G	A/A	A/A	G/G	A/A	A/A	T/G	A/A
12C110P002	12C110P002	1	R	1	R	A/G	G/G	C/C	T/T	G/G	A/G	A/G	A/G	A/C	T/G	A/G	A/G	T/G	A/G
12C110P004	12C110P004	5	S	3	S	A/A	T/T	T/T	C/C	A/A	G/G	G/G	A/A	A/A	G/G	A/A	A/A	G/G	A/A
12C111P001	12C111P001	4.25	S	4.625	S	A/A	T/T	T/T	C/C	A/A	G/G	G/G	A/A	A/A	G/G	A/A	A/A	G/G	A/A
12C111P002	12C111P002	5	S	4.625	S	A/A	T/G	T/C	T/C	A/G	G/G	G/G	A/A	A/A	G/G	A/A	A/A	T/G	A/A
12C112P004	12C112P004	5	S	5	S	A/A	G/G	C/C	T/T	G/G	G/G	G/G	A/A	A/A	G/G	A/A	A/A	T/T	A/A
12C112P007	12C112P007	5	S	4	S	A/A	T/T	T/T	C/C	A/A	G/G	G/G	A/A	A/A	G/G	A/A	A/A	G/G	A/A
12C112P008	12C112P008	5	S	3.25	S	A/A	T/G	T/C	T/C	A/G	G/G	G/G	A/A	A/A	G/G	A/A	A/A	T/G	A/A
12C113P002	12C113P002	4.75	S	3	S	A/A	G/G	C/C	C/C	A/A	G/G	G/G	A/A	A/A	G/G	A/A	A/A	T/T	A/A
12C114P001	12C114P001	4.375	S	3.5	S	A/A	T/G	T/C	C/C	A/A	G/G	G/G	A/A	A/A	G/G	A/A	A/A	T/T	A/A
12C115P005	12C115P005	1	R	1	R	A/G	G/G	C/C	T/C	A/G	A/G	A/G	A/G	A/C	T/G	NA	A/G	T/G	A/G
12C115P006	12C115P006	1	R	1	R	A/G	G/G	C/C	T/C	A/G	A/G	A/G	A/G	A/C	T/G	NA	A/G	T/G	A/G
12C116P001	12C116P001	5	S	4.75	S	A/A	T/G	T/C	C/C	A/A	G/G	G/G	A/A	A/A	G/G	A/A	A/A	T/G	A/A
12C117P001	12C117P001	5	S	4.375	S	A/A	G/G	C/C	T/C	A/G	G/G	G/G	A/A	A/A	G/G	A/A	A/A	T/T	A/A
12C118P001	12C118P001	5	S	2.625	S	A/A	T/G	T/C	C/C	A/A	G/G	G/G	A/A	A/A	G/G	A/A	A/A	T/G	A/A
12C118P002	12C118P002	2.875	S	2.5	R	A/A	T/G	T/C	C/C	A/A	G/G	G/G	A/A	A/A	G/G	A/A	A/A	T/G	A/A
12C122P001	12C122P001	5	S	5	S	A/A	G/G	C/C	T/C	A/G	G/G	G/G	A/A	A/A	G/G	A/A	A/A	T/G	A/A
12C124P001	12C124P001	1.125	R	1.25	R	A/G	G/G	C/C	T/C	A/G	A/G	A/G	A/G	A/C	T/G	A/G	A/G	T/G	A/G
12C125P003	12C125P003	5	S	3.5	S	A/A	T/G	T/C	T/C	A/G	G/G	G/G	A/A	A/A	G/G	A/A	A/A	T/G	A/A
12C128P002	12C128P002	5	S	3.625	S	A/A	T/G	T/C	T/C	A/G	G/G	G/G	A/A	A/A	G/G	A/A	A/A	T/G	A/A
12C129P002	12C129P002	5	S	3.375	S	A/A	T/T	T/T	C/C	A/A	G/G	G/G	A/A	A/A	G/G	A/A	A/A	T/G	A/A
12C130P002	12C130P002	5	S	2.25	R	A/A	T/G	T/C	C/C	A/A	G/G	G/G	A/A	A/A	G/G	A/A	A/A	NA	A/A
12C131P001	12C131P001	4.875	S	4	S	A/A	G/G	C/C	T/C	A/G	G/G	G/G	A/A	A/A	G/G	A/A	A/A	T/T	A/A
12C132P005	12C132P005	5	S	3.75	S	A/A	T/G	T/C	C/C	A/A	G/G	G/G	A/A	A/A	G/G	A/A	A/A	T/T	A/A
12C137P002	12C137P002	5	S	3.375	S	A/A	G/G	C/C	T/C	A/G	G/G	G/G	A/A	A/A	G/G	A/A	A/A	T/T	A/A
12C138P001	12C138P001	5	S	4.125	S	A/A	T/G	T/C	C/C	A/A	G/G	G/G	A/A	A/A	G/G	A/A	A/A	T/T	A/A
12C140P001	12C140P001	5	S	4.5	S	A/A	T/G	T/C	C/C	A/A	G/G	G/G	A/A	A/A	G/G	A/A	A/A	T/G	A/A
12C142P001	12C142P001	1	R	1.19318	R	A/G	G/G	C/C	T/C	A/G	A/G	A/G	A/G	A/C	T/G	A/G	A/G	T/G	A/G
12C143P001	12C143P001	1	R	1.25	R	A/G	G/G	C/C	T/T	G/G	A/G	A/G	A/G	A/C	T/G	G/G	A/G	T/G	A/G
12C145P001	12C145P001	5	S	3.125	S	A/A	T/G	T/C	T/C	A/G	G/G	G/G	A/A	A/A	G/G	A/A	A/A	T/G	A/A
12C146P001	12C146P001	1.125	R	1	R	A/G	T/G	T/C	T/C	NA	A/G	A/G	A/G	A/C	T/G	A/G	A/G	G/G	A/G
12C147P002	12C147P002	4.375	S	1.75	R	A/A	T/G	T/C	T/C	A/G	G/G	G/G	A/A	A/A	G/G	A/A	A/A	T/T	A/A
12C148P005	12C148P005	1	R	1.375	R	A/G	G/G	C/C	T/C	A/G	A/G	A/G	NA	A/C	T/G	A/G	A/G	T/G	A/G
12C149P002	12C149P002	1	R	1.25	R	A/G	G/G	C/C	T/T	G/G	A/G	A/G	A/G	A/C	T/G	A/G	A/G	T/G	A/G
12C151P001	12C151P001	5	S	4.25	S	A/A	T/G	T/C	T/C	A/G	G/G	G/G	A/A	A/A	G/G	A/A	A/A	T/G	A/A
12C152P002	12C152P002	1	R	1	R	A/G	G/G	C/C	T/T	G/G	A/G	A/G	A/G	A/C	T/G	A/G	A/G	T/G	A/G
12C155P001	12C155P001	1	R	0.983838	R	A/G	T/G	T/C	T/C	A/G	A/G	A/G	A/G	A/C	T/G	A/G	A/G	G/G	A/G
12C159P001	12C159P001	5	S	4.125	S	A/A	T/T	T/T	C/C	A/A	G/G	G/G	A/A	A/A	G/G	A/A	A/A	G/G	A/A
12C160P002	12C160P002	1	R	2.52651	S	A/G	T/G	T/C	T/C	A/G	A/G	A/G	A/G	A/C	T/G	A/G	A/G	G/G	A/G
12C160P003	12C160P003	5	S	4.75	S	A/A	T/G	T/C	T/C	A/G	G/G	G/G	A/A	A/A	G/G	A/A	A/A	T/G	A/A
12C161P003	12C161P003	5	S	3.875	S	A/A	T/T	T/T	C/C	A/A	G/G	G/G	A/A	A/A	G/G	A/A	A/A	G/G	A/A
12C162P001	12C162P001	5	S	2.5	R	A/A	T/T	T/T	C/C	A/A	G/G	G/G	A/A	A/A	G/G	A/A	A/A	G/G	A/A
12C162P003	12C162P003	5	S	3.75	S	A/A	T/T	T/T	C/C	A/A	G/G	G/G	A/A	A/A	G/G	A/A	A/A	G/G	A/A
12C166P002	12C166P002	5	S	4.625	S	A/A	T/G	T/C	T/C	A/G	G/G	G/G	A/A	A/A	G/G	A/A	A/A	T/G	A/A
12C167P002	12C167P002	5	S	4.375	S	A/A	T/T	T/T	C/C	A/A	G/G	G/G	A/A	A/A	G/G	A/A	A/A	G/G	A/A
12C169P003	12C169P003	5	S	3.125	S	A/A	T/G	T/C	C/C	A/A	G/G	G/G	A/A	A/A	G/G	A/A	A/A	T/G	A/A
12C169P004	12C169P004	4.5	S	2.625	S	A/A	T/G	T/C	T/C	A/G	G/G	G/G	A/A	A/A	G/G	A/A	A/A	T/G	A/A
12C170P001	12C170P001	5	S	3.125	S	A/A	G/G	C/C	T/C	A/G	G/G	G/G	A/A	A/A	G/G	A/A	A/A	T/T	A/A
12C171P005	12C171P005	5	S	4.25	S	A/A	T/T	T/T	C/C	A/A	G/G	G/G	A/A	A/A	G/G	A/A	A/A	G/G	A/A
12C172P002	12C172P002	5	S	4.375	S	A/A	T/G	T/C	T/C	A/G	G/G	G/G	A/A	A/A	G/G	A/A	A/A	T/G	A/A
12C175P001	12C175P001	5	S	3.625	S	A/A	T/G	T/C	C/C	A/A	G/G	G/G	A/A	A/A	G/G	A/A	A/A	T/G	A/A
12C176P001	12C176P001	4.5	S	3.25	S	A/A	T/T	T/T	C/C	A/A	G/G	G/G	A/A	A/A	G/G	NA	A/A	G/G	A/A
12C177P001	12C177P001	5	S	3.25	S	A/A	T/T	T/T	C/C	A/A	G/G	G/G	A/A	A/A	G/G	A/A	A/A	G/G	A/A
12C178P004	12C178P004	4.875	S	3.125	S	A/A	T/G	T/C	C/C	A/A	G/G	G/G	A/A	A/A	G/G	A/A	A/A	T/G	A/A
12C178P005	12C178P005	5	S	4	S	A/A	G/G	C/C	T/C	A/G	G/G	G/G	A/A	A/A	G/G	A/A	A/A	NA	A/A
12C179P001	12C179P001	5	S	3.625	S	A/A	T/T	T/T	C/C	A/A	G/G	G/G	A/A	A/A	G/G	A/A	A/A	T/G	A/A
12C180P004	12C180P004	5	S	3.5	S	A/A	T/G	T/C	T/C	A/G	G/G	G/G	A/A	A/A	G/G	A/A	A/A	T/G	A/A
12C181P001	12C181P001	5	S	4.125	S	A/A	T/G	T/C	C/C	A/A	G/G	G/G	A/A	A/A	G/G	A/A	A/A	T/T	A/A
12C182P005	12C182P005	4.875	S	4.125	S	A/A	G/G	C/C	T/C	A/G	G/G	G/G	A/A	A/A	G/G	A/A	A/A	T/T	A/A
12C183P001	12C183P001	1	R	2.375	R	A/G	T/G	T/C	T/C	A/G	A/G	A/G	A/G	A/C	NA	A/G	A/G	T/G	A/G
12C184P001	12C184P001	5	S	5	S	A/A	T/T	T/T	C/C	A/A	G/G	G/G	A/A	A/A	G/G	A/A	A/A	T/G	A/A
12C185P001	12C185P001	4.75	S	2.375	R	A/A	T/T	T/T	C/C	A/A	G/G	G/G	A/A	A/A	G/G	A/A	A/A	G/G	A/A
12C186P001	12C186P001	1.125	R	2.625	S	A/G	G/G	C/C	T/T	G/G	A/G	A/G	A/G	A/C	T/G	A/G	A/G	T/G	A/G
12C189P001	12C189P001	1	R	1.25	R	A/G	T/G	T/C	T/C	A/G	A/G	A/G	A/G	A/C	T/G	A/G	A/G	G/G	A/G
12C190P003	12C190P003	5	S	3.125	S	A/A	T/G	T/C	T/C	A/G	G/G	G/G	A/A	A/A	G/G	A/A	A/A	T/G	A/A
12C191P001	12C191P001	1	R	1.375	R	G/G	G/G	C/C	T/T	G/G	A/A	A/A	G/G	C/C	T/T	G/G	G/G	G/G	G/G
12C192P001	12C192P001	5	S	3.875	S	A/A	T/G	T/C	T/C	A/G	G/G	G/G	A/A	A/A	G/G	A/A	A/A	T/G	A/A
12C193P001	12C193P001	1	R	1.4968	S	A/G	T/G	T/C	T/C	A/G	A/G	A/G	A/G	A/C	T/G	A/G	A/G	G/G	A/G
12C194P001	12C194P001	3.25	S	3	S	A/A	T/G	T/C	C/C	A/A	G/G	G/G	A/A	A/A	G/G	A/A	A/A	T/G	A/A
35C035P008	Shasta	2	R	1.125	R	A/G	G/G	C/C	T/C	A/G	A/G	A/G	A/G	A/C	T/G	A/G	A/G	T/G	A/G
35C093P011	Solana	1	R	1.625	R	A/G	T/G	T/C	T/C	A/G	A/G	A/G	A/G	A/C	T/G	A/G	A/G	G/G	A/G
36C003P001	Lassen	5	S	NA	NA	A/A	G/G	C/C	T/T	G/G	G/G	G/G	A/A	A/A	G/G	A/A	A/A	T/T	A/A
36C039P004	Donner	5	S	2.75	S	A/A	T/G	T/C	T/C	A/G	G/G	G/G	A/A	A/A	G/G	A/A	A/A	T/G	A/A
37C020P045	37C020P045	1	R	1.125	R	G/G	G/G	C/C	T/T	G/G	A/A	A/A	G/G	C/C	T/T	G/G	G/G	G/G	NA
39C082P019	39C082P019	1.5	R	NA	NA	A/A	T/G	T/C	C/C	NA	G/G	G/G	A/A	A/A	G/G	A/A	A/A	T/G	A/A
51S001P001	51S001P001	5	S	4.125	S	A/A	G/G	C/C	T/C	A/G	G/G	G/G	A/A	A/A	G/G	A/A	A/A	T/G	A/A
52C016P007	Wiltguard	1	R	1.1505	R	A/A	G/G	C/C	T/C	A/G	G/G	G/G	A/A	A/A	G/G	A/A	A/A	T/G	A/A
53C009P002	Tioga	1	R	1.25	R	A/G	G/G	C/C	T/T	G/G	A/G	A/G	A/G	A/C	T/G	A/G	A/G	T/G	A/G
53C009P010	Fresno	1.125	R	1	R	A/G	G/G	C/C	T/T	G/G	A/G	A/G	A/G	A/C	T/G	NA	A/G	T/G	A/G
55C023P001	55C023P001	4.875	S	3.5	S	A/A	G/G	C/C	C/C	A/A	G/G	G/G	A/A	A/A	G/G	A/A	A/A	T/T	A/A
56C124P012	Sequoia	5	S	2.125	R	A/A	G/G	C/C	T/C	A/G	G/G	G/G	A/A	A/A	G/G	A/A	A/A	T/G	A/A
56S115P011	Aliso	3.75	S	1.5	R	A/A	G/G	C/C	T/T	G/G	G/G	G/G	A/A	A/A	G/G	A/A	A/A	T/T	A/A
59C039P001	59C039P001	2.125	R	3.56721	S	A/A	G/G	C/C	C/C	A/A	G/G	G/G	A/A	A/A	G/G	A/A	A/A	G/G	A/A
61S016P099	61S016P099	4.75	S	2.375	R	A/A	T/G	T/C	T/C	A/G	G/G	G/G	A/A	A/A	G/G	A/A	A/A	T/G	A/A
61S018P045	61S018P045	1	R	1.31721	S	A/G	G/G	C/C	T/C	A/G	A/G	A/G	A/G	A/C	T/G	A/G	A/G	G/G	A/G
61S016P006	61S016P006	1	R	1.35163	R	A/A	G/G	C/C	C/C	A/A	G/G	G/G	A/A	A/A	G/G	A/A	A/A	G/G	A/G
63C120P001	Tufts	2.25	R	1.375	R	A/A	G/G	C/C	T/T	G/G	G/G	G/G	A/A	A/A	G/G	A/A	A/A	T/T	A/A
63C125P039	Aiko	2.5	S	3.25	S	A/G	G/G	C/C	T/T	G/G	A/G	A/G	A/G	A/C	T/G	A/G	A/G	T/G	A/G
65C065P601	65C065P601	1	R	1.25	R	A/G	G/G	C/C	T/C	A/G	A/G	A/G	A/G	A/C	T/G	A/G	A/G	T/G	A/G
65C272P104	Cruz	1	R	2.5	R	A/G	G/G	C/C	T/T	G/G	A/G	A/G	A/G	A/C	T/G	A/G	A/G	T/G	A/G
65CA1501	CA_1501	5	S	3.52651	S	A/G	G/G	C/C	T/T	G/G	G/G	NA	A/G	A/C	G/G	A/G	A/G	G/G	A/G
69C072P102	69C072P102	1	R	1.01829	R	A/G	G/G	C/C	T/T	G/G	A/G	A/G	A/G	A/C	T/G	A/G	A/G	T/G	A/G
69C141P101	Hecker	3.5	S	1.75	R	A/A	G/G	C/C	C/C	A/G	G/G	G/G	A/A	A/A	G/G	A/A	A/A	T/G	A/A
70C003P108	Douglas	5	S	3.375	S	A/A	G/G	C/C	T/T	G/G	G/G	G/G	A/A	A/A	G/G	A/A	A/A	T/T	A/A
70C003P117	70C003P117	5	S	3.5	S	A/A	G/G	C/C	T/C	A/G	G/G	G/G	A/A	A/A	G/G	A/A	A/A	T/T	A/A
70C027P103	70C027P103	1	R	1.5	R	A/G	G/G	C/C	T/T	G/G	A/G	A/G	A/G	A/C	T/G	A/G	A/G	T/G	A/G
70C030P101	70C030P101	3.5	S	3.125	S	A/A	G/G	C/C	T/T	G/G	G/G	G/G	A/A	A/A	G/G	A/A	A/A	T/T	A/A
71C098P605	71C098P605	5	S	4.625	S	A/A	T/G	T/C	T/C	A/G	G/G	G/G	A/A	A/A	G/G	A/A	A/A	T/G	A/A
71C101P611	Pajaro	5	S	4.125	S	A/A	T/G	T/C	T/C	A/G	G/G	G/G	A/A	A/A	G/G	A/A	A/A	T/G	A/A
72C271P105	Brighton	3.66667	S	3	S	A/A	G/G	C/C	T/C	A/G	G/G	G/G	A/A	A/A	G/G	A/A	A/A	NA	A/A
72C330P107	Soquel	1	R	1.375	R	NA	G/G	C/C	T/T	G/G	A/A	A/A	G/G	C/C	T/T	NA	G/G	G/G	A/G
72C361P105	72C361P105	1	R	2.69318	S	A/G	G/G	C/C	T/T	G/G	A/G	A/G	A/G	A/C	T/G	A/G	A/G	T/G	A/G
75C071P105	Muir	5	S	4.375	S	A/A	G/G	C/C	T/T	G/G	G/G	G/G	A/A	A/A	G/G	A/A	A/A	T/T	A/A
75C071P107	Selva	5	S	4.375	S	A/A	T/G	T/C	C/C	A/A	G/G	G/G	A/A	A/A	G/G	A/A	A/A	T/G	A/A
75C121P101	75C121P101	4.625	S	3.125	S	A/A	G/G	C/C	T/C	A/G	G/G	G/G	A/A	A/A	G/G	A/A	A/A	T/T	A/A
77C030P605	Parker	5	S	3.875	S	A/A	T/G	T/C	T/C	A/G	G/G	G/G	A/A	A/A	G/G	A/A	A/A	T/G	A/A
77C032P103	Chandler	5	S	2.625	S	A/A	T/G	T/C	T/C	A/G	G/G	G/G	A/A	A/A	G/G	A/A	A/A	T/G	A/A
81C016P604	81C016P604	5	S	5	S	A/A	T/G	T/C	T/C	A/G	G/G	G/G	A/A	A/A	G/G	A/A	A/A	T/G	A/A
81C043P603	Oso_Grande	1	R	2.5	R	A/G	G/G	C/C	T/T	G/G	A/G	A/G	A/G	A/C	T/G	A/G	A/G	T/G	A/G
82C014P603	Irvine	5	S	NA	NA	A/A	G/G	C/C	T/T	G/G	G/G	G/G	A/A	A/A	G/G	A/A	A/A	T/T	A/A
83C049P001	Seascape	4.66667	S	4.25	S	A/A	T/G	T/C	T/C	A/G	G/G	G/G	A/A	A/A	G/G	A/A	A/A	T/G	A/A
83C076P001	83C076P001	1.375	R	1.5	R	A/G	G/G	C/C	T/T	G/G	A/G	A/G	A/G	A/C	T/G	A/G	A/G	T/G	A/G
83C093P006	Capitola	3.25	S	2.875	S	A/A	G/G	C/C	T/T	G/G	G/G	G/G	A/A	A/A	G/G	A/A	A/A	T/T	A/A
85C093P003	85C093P003	3	S	2.5	R	A/G	G/G	C/C	T/C	A/G	A/G	A/G	A/G	A/A	G/G	A/A	A/A	T/T	A/A
86C065P202	86C065P202	5	S	3.375	S	A/A	G/G	C/C	T/C	A/G	G/G	G/G	A/A	A/A	G/G	A/A	A/A	T/T	A/A
86C169P001	86C169P001	5	S	2.875	S	A/A	T/G	T/C	T/C	A/G	G/G	G/G	A/A	A/A	G/G	A/G	A/A	T/G	A/A
88C029P603	Camarosa	5	S	NA	NA	A/A	G/G	C/C	T/T	G/G	G/G	G/G	A/A	A/A	G/G	A/A	A/A	T/T	A/A
88C031P003	88C031P003	1	R	2.69318	S	A/G	G/G	C/C	T/T	G/G	A/G	A/G	A/G	A/C	T/G	A/G	A/G	T/G	A/G
88C066P610	Anaheim	5	S	4.5	S	A/A	T/G	T/C	T/C	A/G	G/G	G/G	A/A	A/A	G/G	A/A	A/A	T/G	A/A
88C066P616	Laguna	4.375	S	4.31717	S	A/A	T/G	T/C	T/C	A/G	G/G	G/G	A/A	A/A	G/G	A/A	A/A	T/G	A/A
88C070P613	Carlsbad	5	S	5	S	A/A	G/G	C/C	T/T	G/G	G/G	G/G	A/A	A/A	G/G	A/A	A/A	T/T	A/A
88C118P603	88C118P603	5	S	3.75	S	A/A	G/G	C/C	T/T	G/G	G/G	G/G	A/A	A/A	G/G	A/A	A/A	T/G	A/A
88C270P001	88C270P001	5	S	4	S	A/A	T/G	T/C	C/C	A/A	G/G	G/G	A/A	A/A	G/G	A/A	A/A	T/G	A/A
89C029P623	89C029P623	5	S	4	S	A/A	G/G	C/C	T/T	G/G	G/G	G/G	A/A	A/A	G/G	A/A	A/A	T/T	A/A
89C206P002	89C206P002	1	R	1.125	R	A/G	T/G	T/C	T/C	A/G	A/G	A/G	A/G	A/C	T/G	A/G	A/G	G/G	A/G
89C208P012	89C208P012	1	R	0.983838	R	A/G	G/G	C/C	T/T	G/G	A/G	A/G	A/G	A/C	T/G	A/G	A/G	T/G	A/G
89C230P007	89C230P007	5	S	4.375	S	A/A	G/G	C/C	T/C	A/G	G/G	G/G	A/A	A/A	G/G	A/A	A/A	T/G	A/A
90C253P003	90C253P003	5	S	3.625	S	A/A	T/T	T/T	C/C	A/A	G/G	G/G	A/A	A/A	G/G	A/A	A/A	G/G	A/A
91C248P002	Gaviota	5	S	2.75	S	A/A	G/G	C/C	T/C	A/G	G/G	G/G	A/A	A/A	G/G	A/A	A/A	T/T	A/A
91C248P003	Aromas	5	S	3.875	S	A/A	G/G	C/C	T/C	A/G	G/G	G/G	A/A	A/A	G/G	A/A	A/A	T/T	A/A
91C248P006	Diamante	1	R	1.25	R	A/G	T/G	T/C	T/C	A/G	A/G	A/G	A/G	A/C	T/G	A/G	A/G	G/G	A/G
91C324P001	Pacific	5	S	2.375	R	A/A	T/G	T/C	T/C	A/G	G/G	G/G	A/A	A/A	G/G	A/A	A/A	T/G	A/A
91C326P001	91C326P001	5	S	4.625	S	A/A	G/G	C/C	T/T	G/G	G/G	G/G	A/A	A/A	G/G	A/A	A/A	T/T	A/A
91C326P003	91C326P003	5	S	4.75	S	A/A	G/G	C/C	T/T	G/G	G/G	G/G	A/A	A/A	G/G	A/A	A/A	T/T	A/A
92C063P002	92C063P002	5	S	3.875	S	A/A	G/G	C/C	T/T	G/G	G/G	G/G	A/A	A/A	G/G	A/A	A/A	T/T	A/A
92C245P002	92C245P002	1	R	1.25	R	A/G	G/G	C/C	T/C	A/G	A/G	A/G	A/G	A/C	T/G	A/G	A/G	T/G	A/G
93C060P002	93C060P002	5	S	2.25	R	A/A	T/G	T/C	C/C	A/A	G/G	G/G	A/A	A/A	G/G	A/A	A/A	T/G	A/A
94C003P011	Camino_Real	4.5	S	1.625	R	A/A	T/G	T/C	C/C	NA	G/G	G/G	A/A	A/A	G/G	A/A	A/A	NA	A/A
94C016P001	94C016P001	5	S	5	S	A/A	G/G	C/C	T/T	G/G	G/G	G/G	A/A	A/A	G/G	A/A	A/A	T/G	A/A
95C179P002	95C179P002	1	R	1.25	R	A/G	G/G	C/C	T/T	G/G	A/G	A/G	A/G	A/C	T/G	A/G	A/G	T/G	A/G
95C197P001	95C197P001	1	R	1.35985	R	A/G	G/G	C/C	T/T	G/G	A/G	A/G	A/G	A/C	T/G	A/G	A/G	T/G	A/G
95C197P003	95C197P003	1	R	1.375	R	A/G	G/G	C/C	T/T	G/G	A/G	A/G	A/G	A/C	T/G	A/G	A/G	T/G	A/G
96C042P601	Ventana	1	R	1.25	R	A/G	T/G	T/C	T/C	A/G	A/G	A/G	A/G	A/C	T/G	A/G	A/G	G/G	A/G
97C079P014	97C079P014	5	S	3.625	S	A/G	G/G	C/C	T/C	A/G	A/G	A/G	A/G	A/C	T/G	A/G	A/A	T/G	A/A
97C085P006	97C085P006	1	R	1.125	R	A/A	T/G	T/C	T/C	A/G	G/G	G/G	A/A	A/A	G/G	A/A	A/A	T/G	A/A
97C086P001	97C086P001	1	R	1.125	R	A/G	T/G	T/C	T/C	A/G	A/G	A/G	A/G	A/C	T/G	A/G	A/G	G/G	A/G
97C111P005	97C111P005	5	S	4.75	S	A/A	T/T	T/T	C/C	A/A	G/G	G/G	A/A	A/A	G/G	A/A	A/A	G/G	A/A
97C117P003	Albion	5	S	4.16319	S	A/A	T/G	T/C	T/C	A/G	G/G	G/G	A/A	A/A	G/G	A/A	A/A	T/G	A/A
97C156P002	97C156P002	5	S	2.625	S	A/A	G/G	C/C	T/T	G/G	G/G	G/G	A/A	A/A	G/G	A/A	A/A	T/T	A/A
97C192P001	97C192P001	1	R	1.25	R	A/G	T/G	T/C	T/C	A/G	A/G	A/G	A/G	A/C	T/G	A/G	A/G	G/G	A/G
97C209P001	97C209P001	1	R	1.875	R	A/G	G/G	C/C	T/T	G/G	A/G	A/G	A/G	A/C	T/G	A/G	A/G	T/G	A/G
98C152P008	98C152P008	1	R	1	R	A/G	G/G	C/C	T/T	G/G	A/G	A/G	A/G	A/C	T/G	A/G	A/G	T/G	A/G
98C153P003	98C153P003	5	S	3	S	A/A	T/G	T/C	T/C	A/G	G/G	G/G	A/A	A/A	G/G	A/A	A/A	T/G	A/A
99C088P007	99C088P007	5	S	3.25	S	A/A	T/G	T/C	T/C	A/G	G/G	G/G	A/A	A/A	G/G	A/A	A/A	T/G	A/A
PI551394	Earliglow	1	R	1.125	R	A/A	G/G	C/C	T/C	A/G	G/G	G/G	A/A	A/A	G/G	A/A	A/A	G/G	A/A
PI551407	Guardian	1	R	NA	NA	A/A	G/G	C/C	T/T	G/G	G/G	G/G	A/A	A/A	G/G	A/A	A/A	T/G	A/A
